# Supplementary material for: Screening of ionic liquids for the dissolution of chitosan using COSMO-RS
Source: Royal Society of Chemistry journal article supplement (doi:10.1039/d3gc03586g), 2023-12-13

## Supplementary Information

**Table S1**

*Structure of cations (obtained from PubChem database) used in the screening of chitosan dissolution in ILs.*

| No. | List of Cations | Abbreviation | Structure |
|-----|-----------------|--------------|-----------|
| 1   | Alanine         | [Ala]        |           |
| 2   | Arginine        | [Arg]        |           |
| 3   | Asparagine      | [Asn]        |           |
| 4   | Aspartic acid   | [Asp]        |           |
| 5   | Cysteine        | [Cys]        |           |
| 6   | Glutamic acid   | [Glu]        |           |

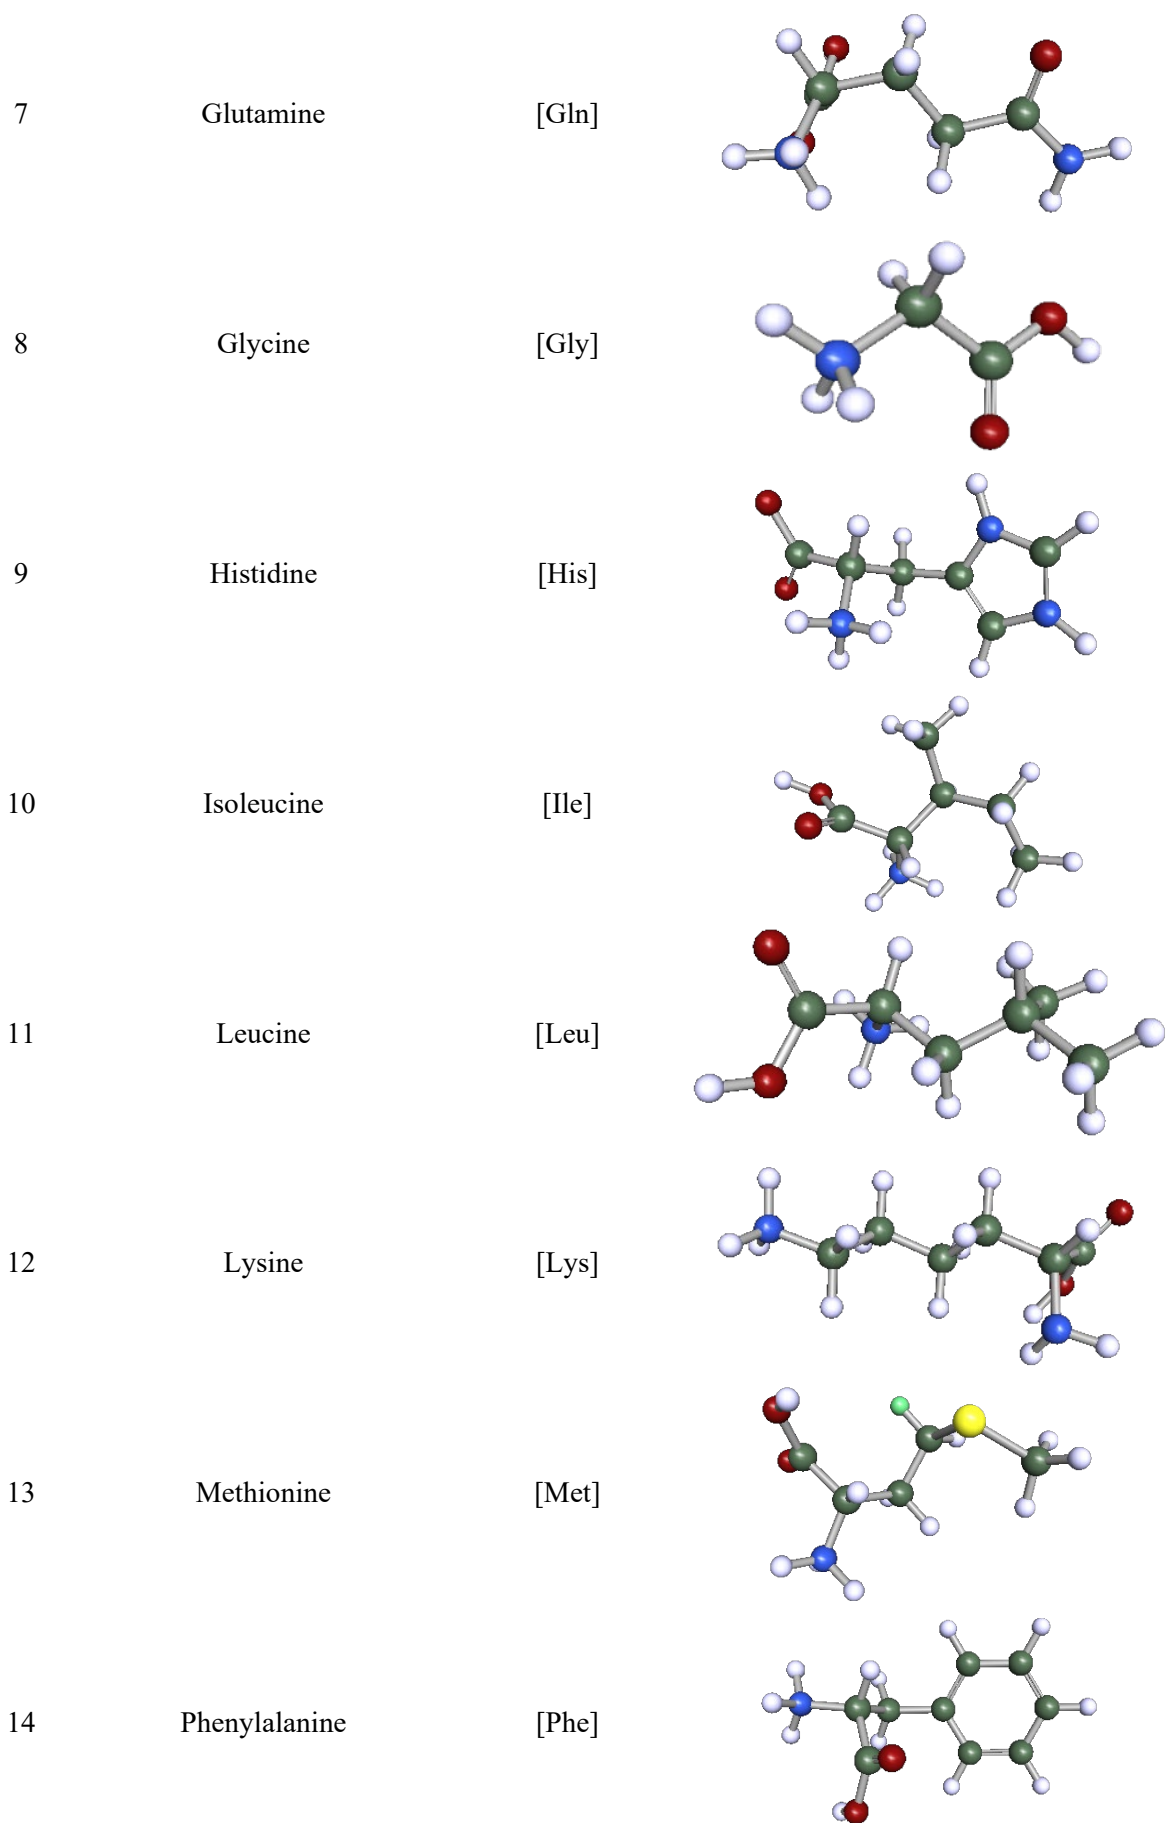

|    |                             |        |                                                                                      |
|----|-----------------------------|--------|--------------------------------------------------------------------------------------|
| 15 | Proline                     | [Pro]  | 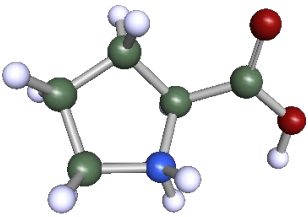   |
| 16 | Serine                      | [Ser]  |    |
| 17 | Threonine                   | [Thr]  |    |
| 18 | Tryptophan                  | [Trp]  |   |
| 19 | Tyrosine                    | [Tyr]  |  |
| 20 | Valine                      | [Val]  |  |
| 21 | 1-ethyl-3-methylimidazolium | [EMIM] |  |
| 22 | 1-butyl-3-methylimidazolium | [BMIM] |  |

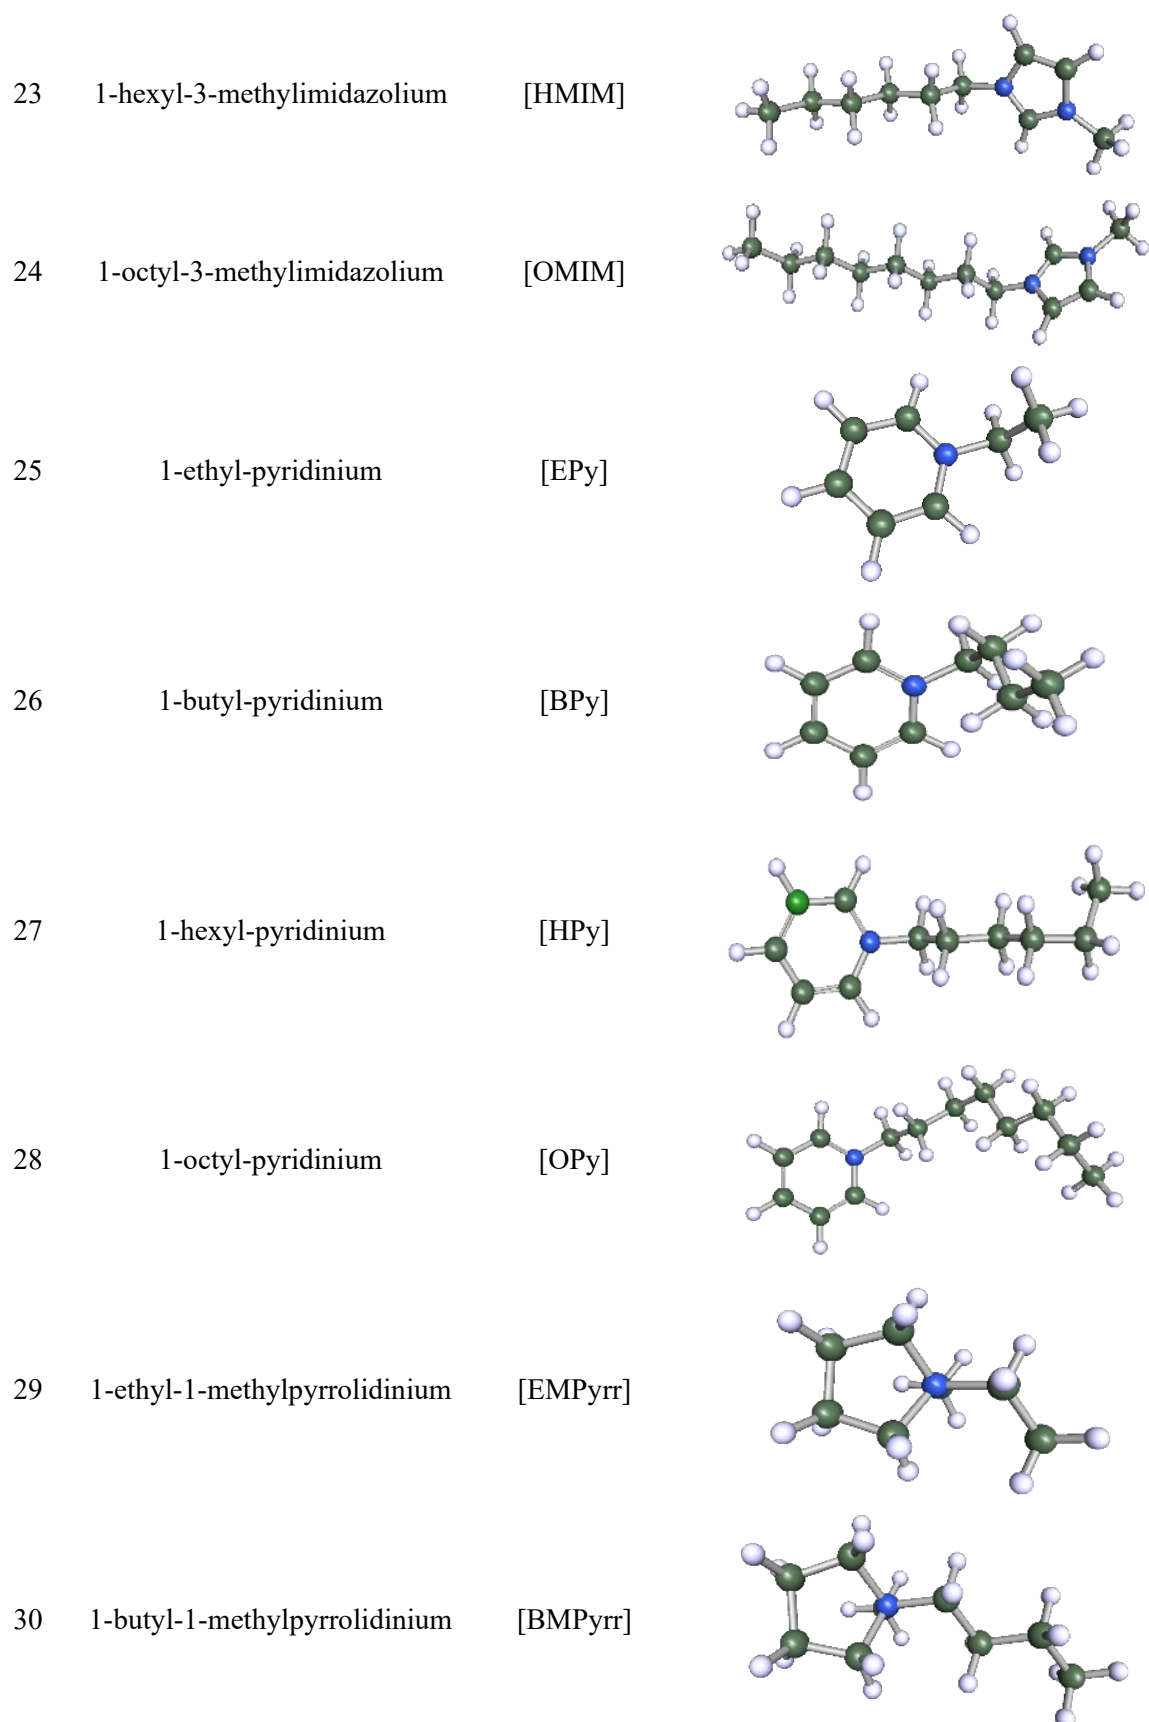

31 1-hexyl-1-methylpyrrolidinium [HMPyrr]

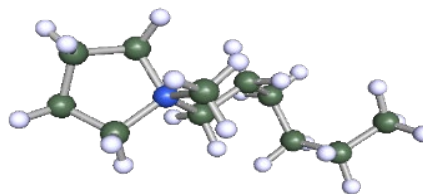

32 1-octyl-1-methylpyrrolidinium [OMPyrr]

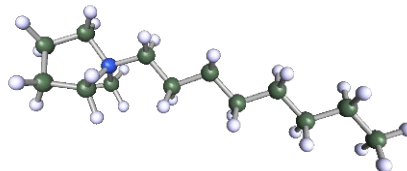

**Table S2**

Structure of anions (obtained from PubChem database) used in the screening of chitosan dissolution in ILs.

| No. | List of Anions | Abbreviation                                     | Structure |
|-----|----------------|--------------------------------------------------|-----------|
| 1   | Acetate        | [C <sub>2</sub> H <sub>3</sub> O <sub>2</sub> ]  |           |
| 2   | Benzoate       | [C <sub>7</sub> H <sub>5</sub> O <sub>2</sub> ]  |           |
| 3   | Bromide        | [Br]                                             |           |
| 4   | Butanoate      | [C <sub>4</sub> H <sub>7</sub> O <sub>2</sub> ]  |           |
| 5   | Butyl sulphate | [C <sub>4</sub> H <sub>9</sub> SO <sub>4</sub> ] |           |
| 6   | Chloride       | [Cl]                                             |           |
| 7   | Ethyl sulphate | [C <sub>2</sub> H <sub>6</sub> SO <sub>4</sub> ] |           |
| 8   | Formate        | [CHO <sub>2</sub> ]                              |           |
| 9   | Hexanoate      | [C <sub>6</sub> H <sub>11</sub> O <sub>2</sub> ] |           |

|    |                   |                                                   |  |
|----|-------------------|---------------------------------------------------|--|
| 10 | Hydrogen sulphate | [HSO <sub>4</sub> ]                               |  |
| 11 | Iodide            | [I]                                               |  |
| 12 | Lactate           | [C <sub>3</sub> H <sub>5</sub> O <sub>3</sub> ]   |  |
| 13 | Nitrate           | [NO <sub>3</sub> ]                                |  |
| 14 | Octanoate         | [C <sub>8</sub> H <sub>15</sub> O <sub>2</sub> ]  |  |
| 15 | Octyl sulphate    | [C <sub>8</sub> H <sub>17</sub> SO <sub>4</sub> ] |  |
| 16 | Propionate        | [C <sub>3</sub> H <sub>5</sub> O <sub>2</sub> ]   |  |
| 17 | Salicylate        | [C <sub>7</sub> H <sub>5</sub> O <sub>3</sub> ]   |  |
| 18 | Thiocyanate       | [SCN]                                             |  |
| 19 | Tetrafluoroborate | [BF <sub>4</sub> ]                                |  |

20

Trifluoroacetate

[C<sub>2</sub>F<sub>3</sub>O<sub>2</sub>]

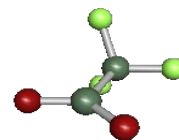



**Table S3**

*Logarithmic activity coefficients at infinite dilution ( $\ln \gamma$ ) of 640 ILs for the dissolution of chitosan.*

|       | [C <sub>2</sub> H <sub>3</sub> O <sub>2</sub> ] | [C <sub>7</sub> H <sub>5</sub> O <sub>2</sub> ] | [Br]    | [C <sub>4</sub> H <sub>7</sub> O <sub>2</sub> ] | [C <sub>4</sub> H <sub>9</sub> SO <sub>4</sub> ] |
|-------|-------------------------------------------------|-------------------------------------------------|---------|-------------------------------------------------|--------------------------------------------------|
| [Ala] | 14.9945                                         | 5.5007                                          | 32.5857 | 9.1590                                          | -4.2662                                          |
| [Arg] | 4.8885                                          | 4.1684                                          | 15.2366 | 2.6791                                          | 6.3230                                           |
| [Asn] | 9.2902                                          | 0.2739                                          | 34.1557 | 1.2986                                          | -3.9418                                          |
| [Asp] | 9.8447                                          | 0.6071                                          | 25.0717 | 4.0551                                          | -6.1041                                          |
| [Cys] | 13.3162                                         | 2.8279                                          | 24.8710 | 7.6049                                          | -11.2186                                         |
| [Gln] | 12.9301                                         | 4.9316                                          | 30.0680 | 7.0333                                          | 0.1183                                           |
| [Glu] | 9.5750                                          | 0.0170                                          | 21.4172 | 4.4208                                          | -6.3733                                          |
| [Gly] | 15.4092                                         | 0.0555                                          | 49.9872 | 4.2574                                          | -4.8089                                          |
| [His] | 11.3984                                         | 8.7467                                          | 23.4885 | 6.1287                                          | 10.5551                                          |
| [Ile] | 7.1171                                          | 5.5854                                          | 9.7719  | 6.7160                                          | -5.3792                                          |
| [Leu] | 8.2396                                          | 5.1379                                          | 11.8488 | 7.2906                                          | -4.8748                                          |
| [Lys] | 6.2437                                          | 2.5809                                          | 18.2482 | 3.0588                                          | 0.2450                                           |
| [Met] | 4.9250                                          | 3.0226                                          | 18.1464 | 2.6293                                          | -0.0007                                          |
| [Phe] | 9.6676                                          | 7.6607                                          | 11.7385 | 7.1717                                          | -10.6651                                         |
| [Pro] | 0.1600                                          | 1.3487                                          | 8.9265  | -1.4976                                         | -4.3143                                          |
| [Ser] | 15.7079                                         | 0.1568                                          | 32.7959 | 7.0785                                          | -12.6536                                         |
| [Thr] | 10.6870                                         | 0.9439                                          | 29.6740 | 4.5328                                          | -3.0046                                          |
| [Trp] | 3.3314                                          | -1.0138                                         | 12.0590 | 0.5492                                          | -6.1732                                          |
| [Tyr] | 7.4428                                          | 0.7153                                          | 13.0698 | 4.1049                                          | -9.1613                                          |
| [Val] | 10.1949                                         | 5.6985                                          | 15.6317 | 8.4298                                          | -4.6829                                          |

|       | [Cl]    | [C <sub>2</sub> H <sub>6</sub> SO <sub>4</sub> ] | [CHO <sub>2</sub> ] | [C <sub>6</sub> H <sub>11</sub> O <sub>2</sub> ] | [HSO <sub>4</sub> ] |
|-------|---------|--------------------------------------------------|---------------------|--------------------------------------------------|---------------------|
| [Ala] | 30.0205 | -1.1757                                          | 21.5839             | 7.8716                                           | 5.1360              |
| [Arg] | 9.0501  | 10.1519                                          | 9.0855              | 0.6544                                           | 22.0472             |
| [Asn] | 31.1246 | 0.0040                                           | 18.2744             | -1.2618                                          | 0.4822              |
| [Asp] | 24.1479 | -3.7222                                          | 15.2614             | 3.2036                                           | -4.1440             |
| [Cys] | 31.8008 | -10.2385                                         | 19.3217             | 5.0957                                           | -18.2958            |
| [Gln] | 28.0568 | 3.7114                                           | 13.3030             | 3.8508                                           | 10.0613             |
| [Glu] | 23.4736 | -3.7222                                          | 23.9990             | 3.7338                                           | -6.3444             |
| [Gly] | 50.6742 | -3.0314                                          | 18.0446             | 2.0124                                           | -22.5911            |
| [His] | 8.7278  | 17.7617                                          | 8.4539              | 6.3944                                           | 40.2089             |
| [Ile] | 10.5144 | -4.8814                                          | 9.6426              | 7.1870                                           | -1.9987             |
| [Leu] | 13.2039 | -4.3824                                          | 10.6859             | 1.5030                                           | -1.8769             |
| [Lys] | 15.2719 | 3.1997                                           | 9.0019              | 1.6890                                           | 10.8769             |
| [Met] | 14.9581 | 1.9922                                           | 10.3654             | 2.6822                                           | 5.6394              |
| [Phe] | 17.7402 | -10.3406                                         | 4.6284              | -3.3194                                          | -13.0226            |
| [Pro] | 1.1913  | -1.0232                                          | 19.6151             | 5.7618                                           | 9.4897              |
| [Ser] | 44.0592 | -11.0961                                         | 16.8861             | 3.3778                                           | -34.9979            |
| [Thr] | 28.2077 | -0.1608                                          | 5.8083              | 0.4080                                           | 1.1257              |
| [Trp] | 14.0669 | -5.0820                                          | 9.6359              | 4.1241                                           | -5.6257             |
| [Tyr] | 16.9276 | -7.8773                                          | 15.3599             | 7.8716                                           | -8.2895             |
| [Val] | 16.9248 | -3.7414                                          | 21.5839             | 8.3579                                           | -0.4142             |

|       | [I]      | [C <sub>3</sub> H <sub>5</sub> O <sub>3</sub> ] | [NO <sub>3</sub> ] | [C <sub>8</sub> H <sub>15</sub> O <sub>2</sub> ] | [C <sub>8</sub> H <sub>17</sub> SO <sub>4</sub> ] |
|-------|----------|-------------------------------------------------|--------------------|--------------------------------------------------|---------------------------------------------------|
| [Ala] | 22.5409  | 8.2618                                          | 9.9562             | 6.6845                                           | -5.0401                                           |
| [Arg] | 19.4112  | 8.4376                                          | 18.8010            | -0.3673                                          | 2.7601                                            |
| [Asn] | 19.5378  | 5.1634                                          | 7.8427             | -3.1115                                          | -6.3484                                           |
| [Asp] | 11.9306  | 3.9913                                          | 1.2171             | 1.5412                                           | -7.0948                                           |
| [Cys] | -3.8946  | 4.2074                                          | -10.8223           | 5.8080                                           | -10.8569                                          |
| [Gln] | 22.5898  | 8.6444                                          | 13.8686            | 3.6277                                           | -2.0605                                           |
| [Glu] | 7.1295   | 3.0118                                          | -1.7039            | 2.2936                                           | -7.0450                                           |
| [Gly] | 10.2129  | 6.1073                                          | -17.2411           | 1.2702                                           | -5.0068                                           |
| [His] | 37.8077  | 15.3678                                         | 37.7594            | -0.1076                                          | 4.4498                                            |
| [Ile] | 0.8327   | 4.6315                                          | 0.5370             | 7.2101                                           | -4.4049                                           |
| [Leu] | 1.8199   | 4.9994                                          | 0.7513             | 7.5584                                           | -3.9628                                           |
| [Lys] | 16.3376  | 5.3360                                          | 11.8896            | 0.9463                                           | -1.3396                                           |
| [Met] | 15.4733  | 3.8078                                          | 7.7901             | 1.8515                                           | -0.2505                                           |
| [Phe] | -7.5286  | 2.8775                                          | -7.1047            | 7.2159                                           | -9.7048                                           |
| [Pro] | 9.8997   | 3.2593                                          | 12.2000            | -3.0628                                          | -5.8252                                           |
| [Ser] | -14.1708 | 3.5597                                          | -26.8943           | 3.3597                                           | -12.6598                                          |
| [Thr] | 19.1186  | 5.1963                                          | 5.8197             | 1.8479                                           | -3.9938                                           |
| [Trp] | -0.2245  | 1.0710                                          | -1.1678            | -0.1590                                          | -6.1534                                           |
| [Tyr] | -2.8906  | 2.5118                                          | -2.7374            | 3.2407                                           | -9.3513                                           |
| [Val] | 5.0561   | 5.9667                                          | 2.5984             | 8.3164                                           | -3.9984                                           |

|       | [C <sub>3</sub> H <sub>5</sub> O <sub>2</sub> ] | [C <sub>7</sub> H <sub>5</sub> O <sub>3</sub> ] | [SCN]    | [BF <sub>4</sub> ] | [C <sub>2</sub> F <sub>3</sub> O <sub>2</sub> ] |
|-------|-------------------------------------------------|-------------------------------------------------|----------|--------------------|-------------------------------------------------|
| [Ala] | 10.9508                                         | -5.5943                                         | -10.0544 | -41.8825           | -4.7867                                         |
| [Arg] | 3.2065                                          | 5.2208                                          | 16.7564  | 15.2529            | 8.6784                                          |
| [Asn] | 3.5805                                          | -7.6810                                         | -16.0717 | -49.1291           | -8.9530                                         |
| [Asp] | 5.7361                                          | -11.6078                                        | -19.2305 | -42.2363           | -11.4978                                        |
| [Cys] | 9.4158                                          | -11.8194                                        | -33.3826 | -76.4755           | -13.1937                                        |
| [Gln] | 8.8598                                          | -2.3950                                         | -1.6384  | -18.8498           | -1.1834                                         |
| [Glu] | 6.0757                                          | -11.9705                                        | -20.1420 | -40.0438           | -11.9205                                        |
| [Gly] | 8.3674                                          | -14.1094                                        | -46.3696 | -94.0122           | -15.9594                                        |
| [His] | 7.9385                                          | 8.4335                                          | 35.4867  | 24.0258            | 12.6115                                         |
| [Ile] | 6.5710                                          | -1.4108                                         | -6.9788  | -24.3324           | -0.6378                                         |
| [Leu] | 7.3394                                          | -2.2030                                         | -7.2833  | -24.5672           | -1.5572                                         |
| [Lys] | 3.9191                                          | -0.9426                                         | 4.6466   | -4.3062            | 0.6539                                          |
| [Met] | 3.0783                                          | -1.6005                                         | 0.0321   | -10.9439           | -0.4700                                         |
| [Phe] | 7.9689                                          | -10.2811                                        | -22.7146 | -55.1759           | -12.0961                                        |
| [Pro] | -1.7450                                         | -1.1201                                         | 6.4857   | -15.9720           | -0.5926                                         |
| [Ser] | 10.1022                                         | -16.3379                                        | -55.6218 | -110.9657          | -19.3503                                        |
| [Thr] | 6.3683                                          | -9.1726                                         | -14.5193 | -37.4413           | -9.0602                                         |
| [Trp] | 0.9734                                          | -8.2223                                         | -13.6586 | -35.1296           | -10.4862                                        |
| [Tyr] | 5.0367                                          | -9.9299                                         | -17.7341 | -43.9722           | -11.5175                                        |
| [Val] | 8.7749                                          | -3.2197                                         | -8.0454  | -26.4786           | -2.3705                                         |

|          | [C <sub>2</sub> H <sub>3</sub> O <sub>2</sub> ] | [C <sub>7</sub> H <sub>5</sub> O <sub>2</sub> ] | [Br]     | [C <sub>4</sub> H <sub>7</sub> O <sub>2</sub> ] | [C <sub>4</sub> H <sub>9</sub> SO <sub>4</sub> ] |
|----------|-------------------------------------------------|-------------------------------------------------|----------|-------------------------------------------------|--------------------------------------------------|
| [EMIM]   | -43.0966                                        | -29.7175                                        | -20.1992 | -38.3110                                        | -2.9698                                          |
| [BMIM]   | -38.9478                                        | -28.3278                                        | -12.4144 | -34.9457                                        | -1.7217                                          |
| [HMIM]   | -36.4855                                        | -27.0365                                        | -8.8177  | -34.1656                                        | -0.3414                                          |
| [OMIM]   | -34.4025                                        | -25.4030                                        | -6.5211  | -32.1979                                        | 1.0778                                           |
| [EPy]    | -42.2562                                        | -29.3666                                        | -19.5752 | -37.5867                                        | -2.4004                                          |
| [BPy]    | -38.0756                                        | -28.2658                                        | -11.0774 | -35.3299                                        | -1.3535                                          |
| [HPy]    | -35.55401                                       | -26.9873                                        | -7.4832  | -33.4839                                        | -0.0566                                          |
| [OPy]    | -33.6113                                        | -25.6751                                        | -5.3205  | -31.8332                                        | -0.0793                                          |
| [EMPyrr] | -58.446                                         | -42.9481                                        | -30.4786 | -52.3524                                        | -5.0000                                          |
| [BMPyrr] | -52.7496                                        | -40.7125                                        | -20.3987 | -49.1957                                        | -3.1563                                          |
| [HMPyrr] | -49.5021                                        | -20.3020                                        | -15.3515 | -47.0009                                        | -1.3944                                          |
| [OMPyrr] | -46.9935                                        | -37.2950                                        | -12.1764 | -45.0039                                        | 0.2555                                           |

|          | [Cl]     | [C <sub>2</sub> H <sub>6</sub> SO <sub>4</sub> ] | [CHO <sub>2</sub> ] | [C <sub>6</sub> H <sub>11</sub> O <sub>2</sub> ] | [HSO <sub>4</sub> ] |
|----------|----------|--------------------------------------------------|---------------------|--------------------------------------------------|---------------------|
| [EMIM]   | -33.6363 | -4.7277                                          | -37.7664            | -37.5738                                         | -7.6563             |
| [BMIM]   | -24.8133 | -3.2066                                          | -32.1679            | -35.7784                                         | -5.5252             |
| [HMIM]   | -20.5495 | -1.7657                                          | -29.2731            | -34.2657                                         | -4.5387             |
| [OMIM]   | -17.6851 | -0.3401                                          | -26.9285            | -32.4666                                         | -3.5725             |
| [EPy]    | -33.2840 | -3.9280                                          | -37.0260            | -36.6017                                         | -6.4530             |
| [BPy]    | -23.5743 | -2.7030                                          | -31.2315            | -34.9152                                         | -4.8970             |
| [HPy]    | -19.2011 | -1.3920                                          | -28.3147            | -33.3214                                         | -4.1352             |
| [OPy]    | -16.5350 | 1.2818                                           | -26.2646            | -16.9867                                         | -3.3556             |
| [EMPyrr] | -44.8648 | -7.9701                                          | -51.3823            | -50.7290                                         | -13.4010            |
| [BMPyrr] | -33.7807 | -5.2834                                          | -43.6490            | -48.5271                                         | -8.9787             |
| [HMPyrr] | -28.1112 | -3.2033                                          | -39.6338            | -46.7541                                         | -6.7953             |
| [OMPyrr] | -24.5135 | -1.4142                                          | -36.8385            | -45.0052                                         | -5.2173             |

|          | [I]      | [C <sub>3</sub> H <sub>5</sub> O <sub>3</sub> ] | [NO <sub>3</sub> ] | [C <sub>8</sub> H <sub>15</sub> O <sub>2</sub> ] | [C <sub>8</sub> H <sub>17</sub> SO <sub>4</sub> ] |
|----------|----------|-------------------------------------------------|--------------------|--------------------------------------------------|---------------------------------------------------|
| [EMIM]   | -7.3539  | -24.7203                                        | -12.8977           | -35.7990                                         | -0.1231                                           |
| [BMIM]   | -1.9139  | -22.5249                                        | -9.4331            | -33.9449                                         | 1.2055                                            |
| [HMIM]   | 0.5863   | -20.8298                                        | -7.5697            | -32.6101                                         | 2.8591                                            |
| [OMIM]   | 2.3084   | -19.0499                                        | -5.9697            | -30.9170                                         | 3.9809                                            |
| [EPy]    | -6.2605  | -24.1883                                        | -12.0380           | -34.6460                                         | 0.1747                                            |
| [BPy]    | -0.6378  | -22.2360                                        | -8.8698            | -33.2533                                         | 1.4224                                            |
| [HPy]    | 1.7032   | -20.5854                                        | -7.2055            | -31.8216                                         | 2.7725                                            |
| [OPy]    | 3.2432   | -19.0586                                        | -5.8135            | -30.4288                                         | 4.1211                                            |
| [EMPyrr] | -14.3851 | -34.8252                                        | -20.3491           | -48.3361                                         | -1.0491                                           |
| [BMPyrr] | -6.3497  | -31.5240                                        | -14.2952           | -46.6656                                         | 0.4641                                            |
| [HMPyrr] | -2.3787  | -29.2785                                        | -11.1899           | -45.1860                                         | 2.0217                                            |
| [OMPyrr] | 0.1722   | -27.3288                                        | -8.9920            | -43.6150                                         | 3.5319                                            |

  

|          | [C <sub>3</sub> H <sub>5</sub> O <sub>2</sub> ] | [C <sub>7</sub> H <sub>5</sub> O <sub>3</sub> ] | [SCN]    | [BF <sub>4</sub> ] | [C <sub>2</sub> F <sub>3</sub> O <sub>2</sub> ] |
|----------|-------------------------------------------------|-------------------------------------------------|----------|--------------------|-------------------------------------------------|
| [EMIM]   | -41.5885                                        | -13.6179                                        | -3.8829  | 3.4701             | -12.5974                                        |
| [BMIM]   | -38.4852                                        | -12.6266                                        | -2.5217  | 4.0167             | -11.6716                                        |
| [HMIM]   | -36.7147                                        | -11.5289                                        | -1.5316  | 4.9062             | -10.1439                                        |
| [OMIM]   | -34.4821                                        | -10.1874                                        | -0.3981  | 6.0563             | -8.4901                                         |
| [EPy]    | -40.6281                                        | -13.3882                                        | -2.6344  | 4.8547             | -12.4019                                        |
| [BPy]    | -37.5759                                        | -12.9485                                        | -1.7440  | 4.8273             | -11.6598                                        |
| [HPy]    | -35.4855                                        | -11.9358                                        | -1.0333  | 5.4732             | -10.3778                                        |
| [OPy]    | -33.6312                                        | -10.7136                                        | -0.1215  | 6.5686             | -8.8901                                         |
| [EMPyrr] | -56.6471                                        | -21.0828                                        | -10.7897 | 2.8650             | -18.7222                                        |
| [BMPyrr] | -51.9589                                        | -19.6433                                        | -6.9065  | 6.0305             | -16.6787                                        |
| [HMPyrr] | -49.2874                                        | -18.2003                                        | -4.7726  | 7.9934             | -14.7072                                        |
| [OMPyrr] | -47.4521                                        | -16.6672                                        | -3.0649  | 9.7015             | -7.7465                                         |

**Table S4***Excess enthalpy ( $H^E$ ) of 640 ILs for the dissolution of chitosan.*

| <b>Cations</b> | <b>Anions</b>                                     | <b>Hydrogen Bonding</b> | <b>Misfit Interactions</b> | <b>Van der Waals Forces</b> | <b>Excess Enthalpy (<math>H^E</math>)</b> |
|----------------|---------------------------------------------------|-------------------------|----------------------------|-----------------------------|-------------------------------------------|
| [Ala]          | [C <sub>2</sub> H <sub>3</sub> O <sub>2</sub> ]   | -42.08613               | 3.40073                    | -9.39108                    | -48.0765                                  |
|                | [C <sub>7</sub> H <sub>5</sub> O <sub>2</sub> ]   | -37.67600               | 4.36959                    | -12.57700                   | -45.8834                                  |
|                | [Br]                                              | -23.58296               | 3.58253                    | -8.98951                    | -28.9899                                  |
|                | [C <sub>4</sub> H <sub>7</sub> O <sub>2</sub> ]   | -42.01800               | 3.75622                    | -11.44600                   | -49.7078                                  |
|                | [C <sub>4</sub> H <sub>9</sub> SO <sub>4</sub> ]  | -20.27200               | 6.10702                    | -13.37300                   | -27.5380                                  |
|                | [Cl]                                              | -29.28726               | 3.51749                    | -8.70355                    | -34.4733                                  |
|                | [C <sub>2</sub> H <sub>6</sub> SO <sub>4</sub> ]  | -20.26500               | 5.50839                    | -11.33800                   | -26.0946                                  |
|                | [CHO <sub>2</sub> ]                               | -37.72200               | 2.94629                    | -8.29220                    | -43.0679                                  |
|                | [C <sub>6</sub> H <sub>11</sub> O <sub>2</sub> ]  | -43.24300               | 4.11137                    | -13.35900                   | -52.4906                                  |
|                | [HSO <sub>4</sub> ]                               | -24.50200               | 3.97210                    | -8.85610                    | -29.3860                                  |
|                | [I]                                               | -16.71700               | 4.06029                    | -10.41000                   | -23.0667                                  |
|                | [C <sub>3</sub> H <sub>5</sub> O <sub>3</sub> ]   | -33.86300               | 3.51414                    | -10.39500                   | -40.7439                                  |
|                | [NO <sub>3</sub> ]                                | -22.98300               | 3.61554                    | -7.85510                    | -27.2226                                  |
|                | [C <sub>8</sub> H <sub>15</sub> O <sub>2</sub> ]  | -43.07000               | 4.39473                    | -15.27100                   | -53.9463                                  |
|                | [C <sub>8</sub> H <sub>17</sub> SO <sub>4</sub> ] | -20.09400               | 7.08679                    | -17.56600                   | -30.5732                                  |
|                | [C <sub>3</sub> H <sub>5</sub> O <sub>2</sub> ]   | -43.02781               | 3.59367                    | -10.37014                   | -49.8043                                  |
|                | [C <sub>7</sub> H <sub>5</sub> O <sub>3</sub> ]   | -28.04400               | 5.08677                    | -12.50800                   | -35.4652                                  |
|                | [SCN]                                             | -19.35600               | 4.75921                    | -9.99250                    | -24.5893                                  |
|                | [BF <sub>4</sub> ]                                | -12.25654               | 6.49603                    | -7.87308                    | -13.6336                                  |
|                | [C <sub>2</sub> F <sub>3</sub> O <sub>2</sub> ]   | -26.13200               | 4.38534                    | -9.07700                    | -30.8237                                  |
| [Arg]          | [C <sub>2</sub> H <sub>3</sub> O <sub>2</sub> ]   | -34.89647               | 6.67687                    | -13.84860                   | -42.0682                                  |
|                | [C <sub>7</sub> H <sub>5</sub> O <sub>2</sub> ]   | -32.00000               | 6.52099                    | -16.97300                   | -42.4520                                  |
|                | [Br]                                              | -25.60498               | 6.82117                    | -13.32963                   | -32.1134                                  |
|                | [C <sub>4</sub> H <sub>7</sub> O <sub>2</sub> ]   | -34.72200               | 6.57440                    | -15.79500                   | -43.9426                                  |
|                | [C <sub>4</sub> H <sub>9</sub> SO <sub>4</sub> ]  | -23.50100               | 6.94645                    | -18.10300                   | -34.6576                                  |
|                | [Cl]                                              | -28.70779               | 7.50232                    | -13.15280                   | -34.3583                                  |
|                | [C <sub>2</sub> H <sub>6</sub> SO <sub>4</sub> ]  | -23.52700               | 6.53943                    | -16.14800                   | -33.1356                                  |
|                | [CHO <sub>2</sub> ]                               | -32.59400               | 6.29622                    | -12.79900                   | -39.0968                                  |

|       |                                                   |           |         |           |          |
|-------|---------------------------------------------------|-----------|---------|-----------|----------|
|       | [C <sub>6</sub> H <sub>11</sub> O <sub>2</sub> ]  | -31.90000 | 6.19391 | -15.95500 | -41.6611 |
|       | [HSO <sub>4</sub> ]                               | -30.57000 | 5.26215 | -13.99900 | -39.3069 |
|       | [I]                                               | -22.24700 | 6.06225 | -14.71000 | -30.8948 |
|       | [C <sub>3</sub> H <sub>5</sub> O <sub>3</sub> ]   | -30.18900 | 5.61354 | -15.06200 | -39.6375 |
|       | [NO <sub>3</sub> ]                                | -24.60900 | 5.24291 | -12.76300 | -32.1291 |
|       | [C <sub>8</sub> H <sub>15</sub> O <sub>2</sub> ]  | -35.46400 | 7.15873 | -19.60000 | -47.9053 |
|       | [C <sub>8</sub> H <sub>17</sub> SO <sub>4</sub> ] | -23.38400 | 7.87425 | -22.19400 | -37.7038 |
|       | [C <sub>3</sub> H <sub>5</sub> O <sub>2</sub> ]   | -35.52697 | 6.66886 | -14.78078 | -43.6389 |
|       | [C <sub>7</sub> H <sub>5</sub> O <sub>3</sub> ]   | -26.89600 | 5.82300 | -17.10100 | -38.1740 |
|       | [SCN]                                             | -22.79900 | 4.85967 | -14.16500 | -32.1043 |
|       | [BF <sub>4</sub> ]                                | -20.32719 | 4.99455 | -12.15665 | -27.4893 |
|       | [C <sub>2</sub> F <sub>3</sub> O <sub>2</sub> ]   | -26.11200 | 5.03231 | -13.36800 | -34.4477 |
| [Asn] | [C <sub>2</sub> H <sub>3</sub> O <sub>2</sub> ]   | -44.95920 | 4.07395 | -10.74914 | -51.6344 |
|       | [C <sub>7</sub> H <sub>5</sub> O <sub>2</sub> ]   | -40.22000 | 5.16439 | -13.91200 | -48.9676 |
|       | [Br]                                              | -25.95266 | 2.92059 | -10.31066 | -33.3427 |
|       | [C <sub>4</sub> H <sub>7</sub> O <sub>2</sub> ]   | -44.68900 | 4.71925 | -12.70400 | -52.6738 |
|       | [C <sub>4</sub> H <sub>9</sub> SO <sub>4</sub> ]  | -22.58400 | 5.54044 | -14.77600 | -31.8196 |
|       | [Cl]                                              | -31.61154 | 3.35726 | -10.17565 | -38.4299 |
|       | [C <sub>2</sub> H <sub>6</sub> SO <sub>4</sub> ]  | -22.62500 | 4.84529 | -12.78500 | -30.5647 |
|       | [CHO <sub>2</sub> ]                               | -40.19900 | 3.30597 | -9.68420  | -46.5772 |
|       | [C <sub>6</sub> H <sub>11</sub> O <sub>2</sub> ]  | -45.92200 | 5.27473 | -14.62400 | -55.2713 |
|       | [HSO <sub>4</sub> ]                               | -26.71400 | 3.68102 | -10.32700 | -33.3600 |
|       | [I]                                               | -19.21200 | 3.16648 | -11.67700 | -27.7225 |
|       | [C <sub>3</sub> H <sub>5</sub> O <sub>3</sub> ]   | -36.54700 | 3.88461 | -11.79600 | -44.4584 |
|       | [NO <sub>3</sub> ]                                | -25.54100 | 3.28038 | -9.38150  | -31.6421 |
|       | [C <sub>8</sub> H <sub>15</sub> O <sub>2</sub> ]  | -45.67900 | 5.71487 | -16.51100 | -56.4751 |
|       | [C <sub>8</sub> H <sub>17</sub> SO <sub>4</sub> ] | -22.33900 | 6.63908 | -18.91200 | -34.6119 |
|       | [C <sub>3</sub> H <sub>5</sub> O <sub>2</sub> ]   | -45.69286 | 4.50756 | -11.69133 | -52.8766 |
|       | [C <sub>7</sub> H <sub>5</sub> O <sub>3</sub> ]   | -30.36700 | 5.67531 | -13.90000 | -38.5917 |
|       | [SCN]                                             | -21.90100 | 4.90462 | -11.21400 | -28.2104 |



|       |                                                   |           |         |           |          |
|-------|---------------------------------------------------|-----------|---------|-----------|----------|
|       | [BF <sub>4</sub> ]                                | -15.00520 | 6.50566 | -9.15675  | -17.6563 |
|       | [C <sub>2</sub> F <sub>3</sub> O <sub>2</sub> ]   | -28.02400 | 5.24981 | -10.47200 | -33.2462 |
| [Asp] | [C <sub>2</sub> H <sub>3</sub> O <sub>2</sub> ]   | -55.25812 | 3.83242 | -9.88307  | -61.3088 |
|       | [C <sub>7</sub> H <sub>5</sub> O <sub>2</sub> ]   | -49.17200 | 4.91642 | -13.21600 | -57.4716 |
|       | [Br]                                              | -31.78430 | 2.78763 | -9.21291  | -38.2096 |
|       | [C <sub>4</sub> H <sub>7</sub> O <sub>2</sub> ]   | -44.68900 | 4.71925 | -12.70400 | -52.6738 |
|       | [C <sub>4</sub> H <sub>9</sub> SO <sub>4</sub> ]  | -22.58400 | 5.54044 | -14.77600 | -31.8196 |
|       | [Cl]                                              | -39.26796 | 3.02619 | -9.04495  | -45.2867 |
|       | [C <sub>2</sub> H <sub>6</sub> SO <sub>4</sub> ]  | -22.62500 | 4.84529 | -12.78500 | -30.5647 |
|       | [CHO <sub>2</sub> ]                               | -40.19900 | 3.30597 | -9.68420  | -46.5772 |
|       | [C <sub>6</sub> H <sub>11</sub> O <sub>2</sub> ]  | -56.71200 | 4.86889 | -13.99600 | -65.8391 |
|       | [HSO <sub>4</sub> ]                               | -31.16000 | 3.50473 | -9.01030  | -36.6656 |
|       | [I]                                               | -22.69600 | 3.17942 | -10.64500 | -30.1616 |
|       | [C <sub>3</sub> H <sub>5</sub> O <sub>3</sub> ]   | -44.79900 | 3.71227 | -10.86400 | -51.9507 |
|       | [NO <sub>3</sub> ]                                | -30.84600 | 3.15873 | -8.09220  | -35.7795 |
|       | [C <sub>8</sub> H <sub>15</sub> O <sub>2</sub> ]  | -56.37500 | 5.27285 | -15.94200 | -67.0442 |
|       | [C <sub>8</sub> H <sub>17</sub> SO <sub>4</sub> ] | -27.26100 | 6.39931 | -18.21100 | -39.0727 |
|       | [C <sub>3</sub> H <sub>5</sub> O <sub>2</sub> ]   | -56.42987 | 4.22672 | -10.91403 | -63.1172 |
|       | [C <sub>7</sub> H <sub>5</sub> O <sub>3</sub> ]   | -36.78900 | 5.44971 | -13.07800 | -44.4173 |
|       | [SCN]                                             | -25.63400 | 4.70713 | -10.38700 | -31.3139 |
|       | [BF <sub>4</sub> ]                                | -16.76837 | 6.15081 | -8.36101  | -18.9786 |
|       | [C <sub>2</sub> F <sub>3</sub> O <sub>2</sub> ]   | -34.30700 | 4.78036 | -9.70680  | -39.2334 |
| [Cys] | [C <sub>2</sub> H <sub>3</sub> O <sub>2</sub> ]   | -49.23359 | 3.57403 | -11.31037 | -56.9699 |
|       | [C <sub>7</sub> H <sub>5</sub> O <sub>2</sub> ]   | -44.40500 | 5.16925 | -14.64200 | -53.8778 |
|       | [Br]                                              | -26.99751 | 3.86048 | -10.85824 | -33.9953 |
|       | [C <sub>4</sub> H <sub>7</sub> O <sub>2</sub> ]   | -49.10800 | 4.10418 | -13.29400 | -58.2978 |
|       | [C <sub>4</sub> H <sub>9</sub> SO <sub>4</sub> ]  | -23.70100 | 7.37223 | -15.24700 | -31.5758 |
|       | [Cl]                                              | -33.34583 | 3.22317 | -10.59518 | -40.7178 |
|       | [C <sub>2</sub> H <sub>6</sub> SO <sub>4</sub> ]  | -23.69500 | 6.80001 | -13.24900 | -30.1440 |
|       | [CHO <sub>2</sub> ]                               | -43.89400 | 3.36060 | -10.23100 | -50.7644 |
|       | [C <sub>6</sub> H <sub>11</sub> O <sub>2</sub> ]  | -50.45300 | 4.37542 | -15.22200 | -61.2996 |
|       | [HSO <sub>4</sub> ]                               | -27.71500 | 6.07916 | -10.75100 | -32.3868 |
|       | [I]                                               | -19.24500 | 5.40858 | -12.27800 | -26.1144 |
|       | [C <sub>3</sub> H <sub>5</sub> O <sub>3</sub> ]   | -39.78800 | 4.41918 | -12.29700 | -47.6658 |
|       | [NO <sub>3</sub> ]                                | -27.27900 | 5.41625 | -9.74120  | -31.6040 |

|       |                                                   |           |           |           |          |
|-------|---------------------------------------------------|-----------|-----------|-----------|----------|
|       | [C <sub>8</sub> H <sub>15</sub> O <sub>2</sub> ]  | -50.29600 | 4.75166   | -17.12000 | -62.6643 |
|       | [C <sub>8</sub> H <sub>17</sub> SO <sub>4</sub> ] | -23.48300 | 8.30849   | -19.39700 | -34.5715 |
|       | [C <sub>3</sub> H <sub>5</sub> O <sub>2</sub> ]   | -50.19286 | 3.83702   | -12.27637 | -58.6322 |
|       | [C <sub>7</sub> H <sub>5</sub> O <sub>3</sub> ]   | -33.34600 | 6.77915   | -14.57600 | -41.1429 |
|       | [SCN]                                             | -23.39800 | 7.52677   | -11.88500 | -27.7562 |
|       | [BF <sub>4</sub> ]                                | -14.25652 | 10.24587  | -9.99910  | -14.0098 |
|       | [C <sub>2</sub> F <sub>3</sub> O <sub>2</sub> ]   | -30.74400 | 6.33422   | -11.25500 | -35.6648 |
| [Gln] | [C <sub>2</sub> H <sub>3</sub> O <sub>2</sub> ]   | -44.83159 | 4.33157   | -11.69427 | -52.1943 |
|       | [C <sub>7</sub> H <sub>5</sub> O <sub>2</sub> ]   | -40.13400 | 5.29363   | -14.83600 | -49.6764 |
|       | [Br]                                              | -27.16348 | 4.03769   | -11.25353 | -34.3793 |
|       | [C <sub>4</sub> H <sub>7</sub> O <sub>2</sub> ]   | -44.57200 | 4.78590   | -13.66400 | -53.4501 |
|       | [C <sub>4</sub> H <sub>9</sub> SO <sub>4</sub> ]  | -23.90500 | 6.47363   | -15.71700 | -33.1484 |
|       | [Cl]                                              | -32.59954 | 4.11927   | -11.08730 | -39.5676 |
|       | [C <sub>2</sub> H <sub>6</sub> SO <sub>4</sub> ]  | -23.94100 | 5.83809   | -13.73000 | -31.8329 |
|       | [CHO <sub>2</sub> ]                               | -40.48400 | 3.76118   | -10.63200 | -47.3548 |
|       | [C <sub>6</sub> H <sub>11</sub> O <sub>2</sub> ]  | -45.88900 | 5.24577   | -15.58800 | -56.2312 |
|       | [HSO <sub>4</sub> ]                               | -28.46000 | 4.46173   | -11.39100 | -35.3893 |
|       | [I]                                               | -21.18800 | 4.37787   | -12.67300 | -29.4831 |
|       | [C <sub>3</sub> H <sub>5</sub> O <sub>3</sub> ]   | -36.65800 | 4.32614   | -12.75000 | -45.0819 |
|       | [NO <sub>3</sub> ]                                | -26.36000 | 4.08225   | -10.36000 | -32.6378 |
|       | [C <sub>8</sub> H <sub>15</sub> O <sub>2</sub> ]  | -50.296   | 4.75166   | -17.12000 | -62.6643 |
|       | [C <sub>8</sub> H <sub>17</sub> SO <sub>4</sub> ] | -23.68500 | 7.53486   | -19.85300 | -36.0031 |
|       | [C <sub>3</sub> H <sub>5</sub> O <sub>2</sub> ]   | -45.68967 | 4.59531   | -12.64578 | -53.7401 |
|       | [C <sub>7</sub> H <sub>5</sub> O <sub>3</sub> ]   | -30.84000 | 5.78354   | -14.82600 | -39.8825 |
|       | [SCN]                                             | -23.11700 | 5.10631   | -12.18700 | -30.1977 |
|       | [BF <sub>4</sub> ]                                | 6.43648   | -17.75792 | -10.15328 | -21.4747 |
|       | [C <sub>2</sub> F <sub>3</sub> O <sub>2</sub> ]   | -28.94600 | 5.11738   | -11.36400 | -35.1926 |
| [Glu] | [C <sub>2</sub> H <sub>3</sub> O <sub>2</sub> ]   | -53.56757 | 4.37384   | -11.02615 | -60.2199 |
|       | [C <sub>7</sub> H <sub>5</sub> O <sub>2</sub> ]   | -47.55400 | 5.62917   | -14.28800 | -56.2128 |
|       | [Br]                                              | -31.27330 | 3.68263   | -10.39065 | -37.9813 |
|       | [C <sub>4</sub> H <sub>7</sub> O <sub>2</sub> ]   | -53.21800 | 4.93597   | -13.10200 | -61.3840 |
|       | [C <sub>4</sub> H <sub>9</sub> SO <sub>4</sub> ]  | -26.96100 | 6.57924   | -15.07000 | -35.4518 |
|       | [Cl]                                              | -38.57703 | 3.55108   | -10.25342 | -45.2794 |
|       | [C <sub>2</sub> H <sub>6</sub> SO <sub>4</sub> ]  | -27.53900 | 4.75259   | -11.79400 | -34.5804 |
|       | [CHO <sub>2</sub> ]                               | -48.38500 | 3.77277   | -9.85910  | -54.4713 |

|       |                                                   |           |         |           |          |
|-------|---------------------------------------------------|-----------|---------|-----------|----------|
|       | [C <sub>6</sub> H <sub>11</sub> O <sub>2</sub> ]  | -54.9620  | 5.37180 | -15.09000 | -64.6802 |
|       | [HSO <sub>4</sub> ]                               | -30.65600 | 4.85343 | -10.29500 | -36.0976 |
|       | [I]                                               | -22.49000 | 4.49846 | -11.81300 | -29.8045 |
|       | [C <sub>3</sub> H <sub>5</sub> O <sub>3</sub> ]   | -43.44000 | 4.53953 | -12.02400 | -50.9245 |
|       | [NO <sub>3</sub> ]                                | -29.98700 | 4.43299 | -9.35090  | -34.9049 |
|       | [C <sub>8</sub> H <sub>15</sub> O <sub>2</sub> ]  | -54.58600 | 5.78305 | -17.02600 | -65.8290 |
|       | [C <sub>8</sub> H <sub>17</sub> SO <sub>4</sub> ] | -26.70700 | 7.59674 | -19.32600 | -38.4363 |
|       | [C <sub>3</sub> H <sub>5</sub> O <sub>2</sub> ]   | -54.70553 | 4.72566 | -12.03823 | -62.0181 |
|       | [C <sub>7</sub> H <sub>5</sub> O <sub>3</sub> ]   | -35.56800 | 6.40582 | -14.17800 | -43.3402 |
|       | [SCN]                                             | -25.02100 | 6.04048 | -11.47100 | -30.4515 |
|       | [BF <sub>4</sub> ]                                | -16.93930 | 7.66548 | -9.41023  | -18.6841 |
|       | [C <sub>2</sub> F <sub>3</sub> O <sub>2</sub> ]   | -33.36600 | 5.72182 | -10.76300 | -38.4072 |
| [Gly] | [C <sub>2</sub> H <sub>3</sub> O <sub>2</sub> ]   | -42.56333 | 3.17867 | -8.47101  | -47.8557 |
|       | [C <sub>7</sub> H <sub>5</sub> O <sub>2</sub> ]   | -37.94500 | 4.75791 | -11.70500 | -44.8921 |
|       | [Br]                                              | -24.63771 | 2.28742 | -7.89322  | -30.2435 |
|       | [C <sub>4</sub> H <sub>7</sub> O <sub>2</sub> ]   | -42.32100 | 3.75984 | -10.50800 | -49.0692 |
|       | [C <sub>4</sub> H <sub>9</sub> SO <sub>4</sub> ]  | -21.13700 | 5.80397 | -12.50300 | -27.8360 |
|       | [Cl]                                              | -30.28026 | 2.19287 | -7.63240  | -35.7198 |
|       | [C <sub>2</sub> H <sub>6</sub> SO <sub>4</sub> ]  | -21.15400 | 5.24174 | -10.43600 | -26.3483 |
|       | [CHO <sub>2</sub> ]                               | -38.30800 | 2.65467 | -7.31760  | -42.9709 |
|       | [C <sub>6</sub> H <sub>11</sub> O <sub>2</sub> ]  | -43.63600 | 4.06881 | -12.46700 | -52.0342 |
|       | [HSO <sub>4</sub> ]                               | -25.36500 | 4.62929 | -7.65560  | -28.3913 |
|       | [I]                                               | -17.66400 | 3.62032 | -9.29430  | -23.3380 |
|       | [C <sub>3</sub> H <sub>5</sub> O <sub>3</sub> ]   | -34.49800 | 3.52253 | -9.47870  | -40.4542 |
|       | [NO <sub>3</sub> ]                                | -23.70500 | 4.09293 | -6.77360  | -26.3857 |
|       | [C <sub>8</sub> H <sub>15</sub> O <sub>2</sub> ]  | -43.39400 | 4.46302 | -14.38100 | -53.3120 |
|       | [C <sub>8</sub> H <sub>17</sub> SO <sub>4</sub> ] | -20.92100 | 6.67705 | -16.71500 | -30.9590 |
|       | [C <sub>3</sub> H <sub>5</sub> O <sub>2</sub> ]   | -43.08466 | 3.61499 | -9.40970  | -48.8794 |
|       | [C <sub>7</sub> H <sub>5</sub> O <sub>3</sub> ]   | -28.26500 | 5.97369 | -11.63500 | -33.9263 |
|       | [SCN]                                             | -19.67200 | 6.73902 | -9.03790  | -21.9709 |
|       | [BF <sub>4</sub> ]                                | -12.91987 | 9.64623 | -7.02079  | -10.2944 |
|       | [C <sub>2</sub> F <sub>3</sub> O <sub>2</sub> ]   | -26.36000 | 5.56005 | -8.30560  | -29.1056 |
| [His] | [C <sub>2</sub> H <sub>3</sub> O <sub>2</sub> ]   | -33.75818 | 5.77151 | -12.56566 | -40.5523 |
|       | [C <sub>7</sub> H <sub>5</sub> O <sub>2</sub> ]   | -30.90700 | 5.81796 | -15.73500 | -40.8240 |

|       |                                                   |           |         |           |          |
|-------|---------------------------------------------------|-----------|---------|-----------|----------|
|       | [Br]                                              | -24.27616 | 5.87507 | -12.43921 | -30.8403 |
|       | [C <sub>4</sub> H <sub>7</sub> O <sub>2</sub> ]   | -33.57800 | 5.88933 | -14.47900 | -42.1677 |
|       | [C <sub>4</sub> H <sub>9</sub> SO <sub>4</sub> ]  | -22.36900 | 6.13345 | -16.70800 | -32.9436 |
|       | [Cl]                                              | -27.23006 | 6.86655 | -11.91335 | -32.2769 |
|       | [C <sub>2</sub> H <sub>6</sub> SO <sub>4</sub> ]  | -22.41200 | 5.51115 | -14.76000 | -31.6609 |
|       | [CHO <sub>2</sub> ]                               | -31.36000 | 5.32884 | -11.54600 | -37.5772 |
|       | [C <sub>6</sub> H <sub>11</sub> O <sub>2</sub> ]  | -34.49100 | 6.44856 | -16.39000 | -44.4324 |
|       | [HSO <sub>4</sub> ]                               | -29.03500 | 3.90146 | -12.61000 | -37.7435 |
|       | [I]                                               | -21.19100 | 4.75362 | -13.82400 | -30.2614 |
|       | [C <sub>3</sub> H <sub>5</sub> O <sub>3</sub> ]   | -28.99800 | 4.69734 | -13.68900 | -37.9897 |
|       | [NO <sub>3</sub> ]                                | -23.51600 | 3.88748 | -11.41700 | -31.0455 |
|       | [C <sub>8</sub> H <sub>15</sub> O <sub>2</sub> ]  | -34.34200 | 6.70874 | -18.26500 | -45.8983 |
|       | [C <sub>8</sub> H <sub>17</sub> SO <sub>4</sub> ] | -22.22500 | 7.28051 | -20.79700 | -35.7415 |
|       | [C <sub>3</sub> H <sub>5</sub> O <sub>2</sub> ]   | -34.40080 | 5.87546 | -13.48216 | -42.0075 |
|       | [C <sub>7</sub> H <sub>5</sub> O <sub>3</sub> ]   | -25.82400 | 5.35223 | -15.79200 | -36.2638 |
|       | [SCN]                                             | -21.86800 | 3.57773 | -13.34300 | -31.6333 |
|       | [BF <sub>4</sub> ]                                | -19.48146 | 3.82307 | -10.69109 | -26.3495 |
|       | [C <sub>2</sub> F <sub>3</sub> O <sub>2</sub> ]   | -24.87600 | 4.69884 | -11.99800 | -32.1752 |
| [Ile] | [C <sub>2</sub> H <sub>3</sub> O <sub>2</sub> ]   | -40.05851 | 4.69433 | -11.83371 | -47.1979 |
|       | [C <sub>7</sub> H <sub>5</sub> O <sub>2</sub> ]   | -36.11000 | 5.23529 | -14.93100 | -45.8057 |
|       | [Br]                                              | -21.79447 | 5.68710 | -11.43309 | -27.5405 |
|       | [C <sub>4</sub> H <sub>7</sub> O <sub>2</sub> ]   | -39.99200 | 4.71216 | -13.84500 | -49.1248 |
|       | [C <sub>4</sub> H <sub>9</sub> SO <sub>4</sub> ]  | -18.86800 | 7.41951 | -15.82200 | -27.2705 |
|       | [Cl]                                              | -27.12551 | 5.41957 | -11.20352 | -32.9095 |
|       | [C <sub>2</sub> H <sub>6</sub> SO <sub>4</sub> ]  | -18.86200 | 7.03497 | -13.80200 | -25.6290 |
|       | [CHO <sub>2</sub> ]                               | -35.79100 | 4.49535 | -10.75000 | -42.0457 |
|       | [C <sub>6</sub> H <sub>11</sub> O <sub>2</sub> ]  | -41.18200 | 5.00940 | -15.79400 | -51.9666 |
|       | [HSO <sub>4</sub> ]                               | -23.23800 | 5.71644 | -11.48800 | -29.0096 |
|       | [I]                                               | -15.37600 | 6.22041 | -12.82100 | -21.9766 |
|       | [C <sub>3</sub> H <sub>5</sub> O <sub>3</sub> ]   | -32.16200 | 4.71577 | -12.86500 | -40.3112 |
|       | [NO <sub>3</sub> ]                                | -21.79300 | 5.40089 | -10.39200 | -26.7841 |
|       | [C <sub>8</sub> H <sub>15</sub> O <sub>2</sub> ]  | -41.10700 | 5.11512 | -17.70700 | -53.6989 |
|       | [C <sub>8</sub> H <sub>17</sub> SO <sub>4</sub> ] | -18.69900 | 8.21368 | -20.00100 | -30.4863 |
|       | [C <sub>3</sub> H <sub>5</sub> O <sub>2</sub> ]   | -40.98688 | 4.66454 | -12.80937 | -49.1317 |
|       | [C <sub>7</sub> H <sub>5</sub> O <sub>3</sub> ]   | -27.04100 | 5.62005 | -14.87700 | -36.2980 |
|       | [SCN]                                             | -18.66100 | 5.85445 | -12.30100 | -25.1076 |

|       |                                                   |           |           |           |          |
|-------|---------------------------------------------------|-----------|-----------|-----------|----------|
|       | [BF <sub>4</sub> ]                                | -11.25588 | 7.26503   | -10.28254 | -14.2734 |
|       | [C <sub>2</sub> F <sub>3</sub> O <sub>2</sub> ]   | -25.04500 | 4.76308   | -11.35800 | -31.6399 |
| [Leu] | [C <sub>2</sub> H <sub>3</sub> O <sub>2</sub> ]   | -40.56087 | 4.44311   | -12.04984 | -48.1676 |
|       | [C <sub>7</sub> H <sub>5</sub> O <sub>2</sub> ]   | -36.45100 | 5.12069   | -15.15500 | -46.4853 |
|       | [Br]                                              | 5.11579   | -22.25287 | -11.66486 | -28.8019 |
|       | [C <sub>4</sub> H <sub>7</sub> O <sub>2</sub> ]   | -40.46810 | 4.51824   | -14.05747 | -50.0073 |
|       | [C <sub>4</sub> H <sub>9</sub> SO <sub>4</sub> ]  | -19.18900 | 7.03702   | -16.03500 | -28.1870 |
|       | [Cl]                                              | -27.69640 | 4.86124   | -11.41236 | -34.2475 |
|       | [C <sub>2</sub> H <sub>6</sub> SO <sub>4</sub> ]  | -19.18500 | 6.65384   | -14.01600 | -26.5472 |
|       | [CHO <sub>2</sub> ]                               | -36.25000 | 4.19350   | -10.96900 | -43.0255 |
|       | [C <sub>6</sub> H <sub>11</sub> O <sub>2</sub> ]  | -41.68400 | 4.81119   | -16.00400 | -52.8768 |
|       | [HSO <sub>4</sub> ]                               | -23.51200 | 5.38761   | -11.70500 | -29.8294 |
|       | [I]                                               | -15.71000 | 5.72832   | -13.06000 | -23.0417 |
|       | [C <sub>3</sub> H <sub>5</sub> O <sub>3</sub> ]   | -32.55200 | 4.47208   | -13.07700 | -41.1569 |
|       | [NO <sub>3</sub> ]                                | -22.04800 | 5.07487   | -10.60400 | -27.5771 |
|       | [C <sub>8</sub> H <sub>15</sub> O <sub>2</sub> ]  | -41.56900 | 4.95449   | -17.91500 | -54.5295 |
|       | [C <sub>8</sub> H <sub>17</sub> SO <sub>4</sub> ] | -19.01700 | 7.81962   | -20.21300 | -31.4104 |
|       | [C <sub>3</sub> H <sub>5</sub> O <sub>2</sub> ]   | -41.47798 | 4.46988   | -13.02271 | -50.0308 |
|       | [C <sub>7</sub> H <sub>5</sub> O <sub>3</sub> ]   | -27.20300 | 5.53674   | -15.09900 | -36.7653 |
|       | [SCN]                                             | -18.78900 | 5.66977   | -12.54400 | -25.6632 |
|       | [BF <sub>4</sub> ]                                | -11.49133 | 7.04661   | -10.49220 | -14.9369 |
|       | [C <sub>2</sub> F <sub>3</sub> O <sub>2</sub> ]   | -25.23500 | 4.66170   | -11.56700 | -32.1403 |
| [Lys] | [C <sub>2</sub> H <sub>3</sub> O <sub>2</sub> ]   | -34.15288 | 5.43748   | -12.65756 | -41.3730 |
|       | [C <sub>7</sub> H <sub>5</sub> O <sub>2</sub> ]   | -30.60200 | 6.05550   | -15.70600 | -40.2525 |
|       | [Br]                                              | -20.36238 | 5.75590   | -12.22720 | -26.8337 |
|       | [C <sub>4</sub> H <sub>7</sub> O <sub>2</sub> ]   | -34.02400 | 5.69834   | -14.64400 | -42.9697 |
|       | [C <sub>4</sub> H <sub>9</sub> SO <sub>4</sub> ]  | -17.75800 | 7.56909   | -16.71100 | -26.8999 |
|       | [Cl]                                              | -24.62229 | 5.83214   | -12.02305 | -30.8132 |
|       | [C <sub>2</sub> H <sub>6</sub> SO <sub>4</sub> ]  | -17.77300 | 6.96596   | -14.71800 | -25.5250 |
|       | [CHO <sub>2</sub> ]                               | -30.78200 | 4.99416   | -11.59000 | -37.3778 |
|       | [C <sub>6</sub> H <sub>11</sub> O <sub>2</sub> ]  | -31.14900 | 6.21867   | -14.75500 | -39.6853 |
|       | [HSO <sub>4</sub> ]                               | -22.59000 | 5.44823   | -12.46800 | -29.6098 |
|       | [I]                                               | -15.65300 | 5.89391   | -13.61800 | -23.3771 |
|       | [C <sub>3</sub> H <sub>5</sub> O <sub>3</sub> ]   | -27.67400 | 5.21002   | -13.74300 | -36.2070 |
|       | [NO <sub>3</sub> ]                                | -19.59700 | 5.17987   | -11.33700 | -25.7541 |

|       |                                                   |           |         |           |          |
|-------|---------------------------------------------------|-----------|---------|-----------|----------|
|       | [C <sub>8</sub> H <sub>15</sub> O <sub>2</sub> ]  | -34.97000 | 6.47299 | -18.48300 | -46.9800 |
|       | [C <sub>8</sub> H <sub>17</sub> SO <sub>4</sub> ] | -17.61600 | 8.66416 | -20.85600 | -29.8078 |
|       | [C <sub>3</sub> H <sub>5</sub> O <sub>2</sub> ]   | -34.94978 | 5.56517 | -13.61557 | -43.0002 |
|       | [C <sub>7</sub> H <sub>5</sub> O <sub>3</sub> ]   | -23.32100 | 6.18961 | -15.70800 | -32.8394 |
|       | [SCN]                                             | -17.20400 | 5.51797 | -13.05600 | -24.7420 |
|       | [BF <sub>4</sub> ]                                | -12.86858 | 6.47734 | -11.01753 | -17.4088 |
|       | [C <sub>2</sub> F <sub>3</sub> O <sub>2</sub> ]   | -21.93500 | 5.37906 | -12.16700 | -28.7229 |
| [Met] | [C <sub>2</sub> H <sub>3</sub> O <sub>2</sub> ]   | -27.57208 | 4.89357 | -12.57464 | -35.2532 |
|       | [C <sub>7</sub> H <sub>5</sub> O <sub>2</sub> ]   | -24.39400 | 5.51524 | -15.77200 | -34.6508 |
|       | [Br]                                              | -15.91300 | 5.73584 | -12.18457 | -22.3617 |
|       | [C <sub>4</sub> H <sub>7</sub> O <sub>2</sub> ]   | -27.40600 | 5.13161 | -14.55800 | -36.8324 |
|       | [C <sub>4</sub> H <sub>9</sub> SO <sub>4</sub> ]  | -13.37600 | 7.74374 | -16.57100 | -22.2033 |
|       | [Cl]                                              | -19.77290 | 5.64121 | -11.90872 | -26.0404 |
|       | [C <sub>2</sub> H <sub>6</sub> SO <sub>4</sub> ]  | -13.40200 | 7.14233 | -14.58400 | -20.8437 |
|       | [CHO <sub>2</sub> ]                               | -24.90200 | 4.59441 | -11.50400 | -31.8116 |
|       | [C <sub>6</sub> H <sub>11</sub> O <sub>2</sub> ]  | -28.37900 | 5.55924 | -16.49000 | -39.3098 |
|       | [HSO <sub>4</sub> ]                               | -17.95800 | 5.68115 | -12.24600 | -24.5229 |
|       | [I]                                               | -11.29800 | 6.07352 | -13.59100 | -18.8155 |
|       | [C <sub>3</sub> H <sub>5</sub> O <sub>3</sub> ]   | -27.67400 | 5.21002 | -13.74300 | -36.2070 |
|       | [NO <sub>3</sub> ]                                | -19.59700 | 5.17987 | -11.33700 | -25.7541 |
|       | [C <sub>8</sub> H <sub>15</sub> O <sub>2</sub> ]  | -28.21700 | 5.78084 | -18.38900 | -40.8252 |
|       | [C <sub>8</sub> H <sub>17</sub> SO <sub>4</sub> ] | -17.61600 | 8.66416 | -20.85600 | -29.8078 |
|       | [C <sub>3</sub> H <sub>5</sub> O <sub>2</sub> ]   | -28.26040 | 4.98002 | -13.53901 | -36.8194 |
|       | [C <sub>7</sub> H <sub>5</sub> O <sub>3</sub> ]   | -23.32100 | 6.18961 | -15.70800 | -32.8394 |
|       | [SCN]                                             | -17.20400 | 5.51797 | -13.05600 | -24.7420 |
|       | [BF <sub>4</sub> ]                                | -8.16247  | 7.44255 | -11.05254 | -11.7725 |
|       | [C <sub>2</sub> F <sub>3</sub> O <sub>2</sub> ]   | -16.95500 | 5.40637 | -12.25400 | -23.8026 |
| [Phe] | [C <sub>2</sub> H <sub>3</sub> O <sub>2</sub> ]   | -46.24999 | 4.62551 | -13.13025 | -54.7547 |
|       | [C <sub>7</sub> H <sub>5</sub> O <sub>2</sub> ]   | -41.76100 | 6.19112 | -16.30000 | -51.8699 |
|       | [Br]                                              | -25.23251 | 5.52219 | -12.71884 | -32.4292 |
|       | [C <sub>4</sub> H <sub>7</sub> O <sub>2</sub> ]   | -46.20200 | 5.06998 | -15.10200 | -56.2340 |
|       | [C <sub>4</sub> H <sub>9</sub> SO <sub>4</sub> ]  | -22.02800 | 8.95331 | -17.13100 | -30.2057 |
|       | [Cl]                                              | -31.33279 | 4.55193 | -12.49273 | -39.2736 |
|       | [C <sub>2</sub> H <sub>6</sub> SO <sub>4</sub> ]  | -22.00300 | 8.43096 | -15.16700 | -28.739  |

|       |                                                   |           |          |           |          |
|-------|---------------------------------------------------|-----------|----------|-----------|----------|
|       | [CHO <sub>2</sub> ]                               | -41.23800 | 4.53514  | -12.07700 | -48.7799 |
|       | [C <sub>6</sub> H <sub>11</sub> O <sub>2</sub> ]  | -47.50200 | 5.30066  | -17.01800 | -59.2193 |
|       | [HSO <sub>4</sub> ]                               | -25.99800 | 7.57230  | -12.91400 | -31.3397 |
|       | [I]                                               | -17.82200 | 7.22355  | -14.15900 | -24.7575 |
|       | [C <sub>3</sub> H <sub>5</sub> O <sub>3</sub> ]   | -37.22100 | 5.63775  | -14.17500 | -45.7583 |
|       | [NO <sub>3</sub> ]                                | -25.24600 | 6.89000  | -11.81900 | -30.1750 |
|       | [C <sub>8</sub> H <sub>15</sub> O <sub>2</sub> ]  | -47.39000 | 5.64987  | -18.91000 | -60.6501 |
|       | [C <sub>8</sub> H <sub>17</sub> SO <sub>4</sub> ] | -21.85900 | 9.86518  | -21.24500 | -33.2388 |
|       | [C <sub>3</sub> H <sub>5</sub> O <sub>2</sub> ]   | -47.26604 | 4.79467  | -14.08536 | -56.5567 |
|       | [C <sub>7</sub> H <sub>5</sub> O <sub>3</sub> ]   | -31.15600 | 7.84827  | -16.28800 | -39.5957 |
|       | [SCN]                                             | -21.59300 | 8.62388  | -13.76700 | -26.7361 |
|       | [BF <sub>4</sub> ]                                | -13.10358 | 11.02352 | -11.56775 | -13.6478 |
|       | [C <sub>2</sub> F <sub>3</sub> O <sub>2</sub> ]   | -28.86700 | 7.21699  | -12.66400 | -34.3140 |
| [Pro] | [C <sub>2</sub> H <sub>3</sub> O <sub>2</sub> ]   | -38.46692 | 5.39592  | -10.46227 | -43.5333 |
|       | [C <sub>7</sub> H <sub>5</sub> O <sub>2</sub> ]   | -34.86000 | 5.35415  | -13.58500 | -43.0909 |
|       | [Br]                                              | -20.47735 | 5.71367  | -10.25360 | -25.0173 |
|       | [C <sub>4</sub> H <sub>7</sub> O <sub>2</sub> ]   | -38.41700 | 5.52259  | -12.46300 | -45.3574 |
|       | [C <sub>4</sub> H <sub>9</sub> SO <sub>4</sub> ]  | -17.89000 | 6.32179  | -14.46800 | -26.0362 |
|       | [Cl]                                              | -25.42798 | 6.49073  | -9.93012  | -28.8674 |
|       | [C <sub>2</sub> H <sub>6</sub> SO <sub>4</sub> ]  | -17.89700 | 5.67537  | -12.45500 | -24.6766 |
|       | [CHO <sub>2</sub> ]                               | -34.09800 | 4.88064  | -9.38520  | -38.6026 |
|       | [C <sub>6</sub> H <sub>11</sub> O <sub>2</sub> ]  | -39.46500 | 6.10888  | -14.40900 | -47.7651 |
|       | [HSO <sub>4</sub> ]                               | -22.28700 | 3.92500  | -10.11800 | -28.4800 |
|       | [I]                                               | -14.54800 | 4.89698  | -11.65000 | -21.3010 |
|       | [C <sub>3</sub> H <sub>5</sub> O <sub>3</sub> ]   | -30.87600 | 4.46643  | -11.49600 | -37.9056 |
|       | [NO <sub>3</sub> ]                                | -20.96800 | 3.84833  | -9.03940  | -26.1591 |
|       | [C <sub>8</sub> H <sub>15</sub> O <sub>2</sub> ]  | -39.44400 | 6.32698  | -16.31800 | -49.4350 |
|       | [C <sub>8</sub> H <sub>17</sub> SO <sub>4</sub> ] | -17.71600 | 7.47979  | -18.63800 | -28.8742 |
|       | [C <sub>3</sub> H <sub>5</sub> O <sub>2</sub> ]   | -39.26226 | 5.48702  | -11.43252 | -45.2078 |
|       | [C <sub>7</sub> H <sub>5</sub> O <sub>3</sub> ]   | -26.24600 | 4.96843  | -13.53600 | -34.8136 |
|       | [SCN]                                             | -18.28300 | 3.68323  | -11.14100 | -25.7408 |
|       | [BF <sub>4</sub> ]                                | -10.79239 | 4.42292  | -8.90804  | -15.2775 |
|       | [C <sub>2</sub> F <sub>3</sub> O <sub>2</sub> ]   | -23.91600 | 4.31197  | -10.00900 | -29.6130 |
| [Ser] | [C <sub>2</sub> H <sub>3</sub> O <sub>2</sub> ]   | -56.47820 | 3.57022  | -9.46461  | -62.3726 |
|       | [C <sub>7</sub> H <sub>5</sub> O <sub>2</sub> ]   | -50.59900 | 5.24733  | -12.70500 | -58.0567 |

|       |                                                   |           |          |           |          |
|-------|---------------------------------------------------|-----------|----------|-----------|----------|
|       | [Br]                                              | -31.70515 | 3.15868  | -8.88104  | -37.4275 |
|       | [C <sub>4</sub> H <sub>7</sub> O <sub>2</sub> ]   | -56.25500 | 4.25626  | -11.50900 | -63.5077 |
|       | [C <sub>4</sub> H <sub>9</sub> SO <sub>4</sub> ]  | -27.74600 | 7.01456  | -13.47700 | -34.2084 |
|       | [Cl]                                              | -39.19332 | 2.64031  | -8.68290  | -45.2359 |
|       | [C <sub>2</sub> H <sub>6</sub> SO <sub>4</sub> ]  | -27.73000 | 6.33220  | -11.41800 | -32.8158 |
|       | [CHO <sub>2</sub> ]                               | -50.60200 | 3.17036  | -8.32040  | -55.7520 |
|       | [C <sub>6</sub> H <sub>11</sub> O <sub>2</sub> ]  | -57.91700 | 4.64750  | -13.47000 | -66.7395 |
|       | [HSO <sub>4</sub> ]                               | -31.56200 | 5.84877  | -8.68500  | -34.3982 |
|       | [I]                                               | -22.79100 | 4.86797  | -10.28400 | -28.2070 |
|       | [C <sub>3</sub> H <sub>5</sub> O <sub>3</sub> ]   | -45.69400 | 4.28506  | -10.46700 | -51.8759 |
|       | [NO <sub>3</sub> ]                                | -31.47600 | 5.20373  | -7.79370  | -34.0660 |
|       | [C <sub>8</sub> H <sub>15</sub> O <sub>2</sub> ]  | -57.62000 | 5.09269  | -15.38900 | -67.9163 |
|       | [C <sub>8</sub> H <sub>17</sub> SO <sub>4</sub> ] | -27.70500 | 7.98150  | -17.65500 | -37.3785 |
|       | [C <sub>3</sub> H <sub>5</sub> O <sub>2</sub> ]   | -57.62143 | 3.96889  | -10.45916 | -64.1117 |
|       | [C <sub>7</sub> H <sub>5</sub> O <sub>3</sub> ]   | -37.98200 | 6.72419  | -12.62800 | -43.8858 |
|       | [SCN]                                             | -26.91400 | 7.83843  | -10.02000 | -29.0956 |
|       | [BF <sub>4</sub> ]                                | -17.41247 | 11.02110 | -8.02326  | -14.4146 |
|       | [C <sub>2</sub> F <sub>3</sub> O <sub>2</sub> ]   | -35.31500 | 6.40415  | -9.29970  | -38.2106 |
| [Thr] | [C <sub>2</sub> H <sub>3</sub> O <sub>2</sub> ]   | -41.45596 | 3.96986  | -10.20940 | -47.6955 |
|       | [C <sub>7</sub> H <sub>5</sub> O <sub>2</sub> ]   | -36.56900 | 5.07554  | -13.39700 | -44.8905 |
|       | [Br]                                              | -24.53538 | 3.58745  | -9.68298  | -30.6309 |
|       | [C <sub>4</sub> H <sub>7</sub> O <sub>2</sub> ]   | -56.25500 | 4.25626  | -11.50900 | -63.5077 |
|       | [C <sub>4</sub> H <sub>9</sub> SO <sub>4</sub> ]  | -27.74600 | 7.01456  | -13.47700 | -34.2084 |
|       | [Cl]                                              | -30.26478 | 3.57587  | -9.52380  | -36.2127 |
|       | [C <sub>2</sub> H <sub>6</sub> SO <sub>4</sub> ]  | -27.73000 | 6.33220  | -11.41800 | -32.8158 |
|       | [CHO <sub>2</sub> ]                               | -50.60200 | 3.17036  | -8.32040  | -55.752  |
|       | [C <sub>6</sub> H <sub>11</sub> O <sub>2</sub> ]  | -42.52900 | 4.90354  | -14.19900 | -51.8245 |
|       | [HSO <sub>4</sub> ]                               | -24.89200 | 4.39265  | -9.62310  | -30.1225 |
|       | [I]                                               | -17.56800 | 4.19459  | -11.10300 | -24.4764 |
|       | [C <sub>3</sub> H <sub>5</sub> O <sub>3</sub> ]   | -33.55600 | 4.04026  | -11.22200 | -40.7377 |
|       | [NO <sub>3</sub> ]                                | -22.99800 | 3.98103  | -8.65960  | -27.6766 |
|       | [C <sub>8</sub> H <sub>15</sub> O <sub>2</sub> ]  | -42.18700 | 5.26784  | -16.11800 | -53.0372 |
|       | [C <sub>8</sub> H <sub>17</sub> SO <sub>4</sub> ] | -20.61400 | 7.36424  | -18.41600 | -31.6658 |
|       | [C <sub>3</sub> H <sub>5</sub> O <sub>2</sub> ]   | -42.32452 | 4.27528  | -11.19596 | -49.2452 |
|       | [C <sub>7</sub> H <sub>5</sub> O <sub>3</sub> ]   | -27.09100 | 5.79903  | -13.32300 | -34.6150 |



|       |                                                   |           |         |           |          |
|-------|---------------------------------------------------|-----------|---------|-----------|----------|
|       | [SCN]                                             | -18.81200 | 5.45129 | -10.70300 | -24.0637 |
|       | [BF <sub>4</sub> ]                                | -12.91444 | 7.16339 | -8.67112  | -14.4222 |
|       | [C <sub>2</sub> F <sub>3</sub> O <sub>2</sub> ]   | -25.53200 | 5.19444 | -9.91540  | -30.2530 |
| [Trp] | [C <sub>2</sub> H <sub>3</sub> O <sub>2</sub> ]   | -43.83079 | 5.28686 | -14.47811 | -53.0220 |
|       | [C <sub>7</sub> H <sub>5</sub> O <sub>2</sub> ]   | -39.16500 | 6.43087 | -17.63100 | -50.3651 |
|       | [Br]                                              | -24.74475 | 4.85275 | -14.08616 | -33.9782 |
|       | [C <sub>4</sub> H <sub>7</sub> O <sub>2</sub> ]   | -41.13500 | 4.46740 | -12.24100 | -48.9086 |
|       | [C <sub>4</sub> H <sub>9</sub> SO <sub>4</sub> ]  | -20.82200 | 6.33781 | -14.21300 | -28.6972 |
|       | [Cl]                                              | -30.55178 | 4.69438 | -13.90261 | -39.7600 |
|       | [C <sub>2</sub> H <sub>6</sub> SO <sub>4</sub> ]  | -20.84700 | 5.69786 | -12.16700 | -27.3161 |
|       | [CHO <sub>2</sub> ]                               | -37.48500 | 3.40367 | -9.09260  | -43.1739 |
|       | [C <sub>6</sub> H <sub>11</sub> O <sub>2</sub> ]  | -44.88900 | 6.14935 | -18.32700 | -57.0667 |
|       | [HSO <sub>4</sub> ]                               | -25.23200 | 5.98247 | -14.36500 | -33.6145 |
|       | [I]                                               | -17.61300 | 5.65875 | -15.53700 | -27.4913 |
|       | [C <sub>3</sub> H <sub>5</sub> O <sub>3</sub> ]   | -35.39000 | 5.41627 | -15.54700 | -45.5207 |
|       | [NO <sub>3</sub> ]                                | -24.22400 | 5.54611 | -13.24100 | -31.9189 |
|       | [C <sub>8</sub> H <sub>15</sub> O <sub>2</sub> ]  | -44.66600 | 6.52048 | -20.20600 | -58.3515 |
|       | [C <sub>8</sub> H <sub>17</sub> SO <sub>4</sub> ] | -21.14700 | 8.37825 | -22.57600 | -35.3448 |
|       | [C <sub>3</sub> H <sub>5</sub> O <sub>2</sub> ]   | -44.63145 | 5.57886 | -15.42013 | -54.4727 |
|       | [C <sub>7</sub> H <sub>5</sub> O <sub>3</sub> ]   | -29.24600 | 7.18684 | -17.64600 | -39.7052 |
|       | [SCN]                                             | -20.45600 | 6.89751 | -15.11400 | -28.6725 |
|       | [BF <sub>4</sub> ]                                | -12.89370 | 8.27485 | -12.95530 | -17.5742 |
|       | [C <sub>2</sub> F <sub>3</sub> O <sub>2</sub> ]   | -26.98700 | 6.57773 | -13.98300 | -34.3923 |
| [Tyr] | [C <sub>2</sub> H <sub>3</sub> O <sub>2</sub> ]   | -54.67455 | 4.85890 | -13.27924 | -63.0949 |
|       | [C <sub>7</sub> H <sub>5</sub> O <sub>2</sub> ]   | -48.97800 | 6.01617 | -16.46200 | -59.4238 |
|       | [Br]                                              | -30.62599 | 4.55778 | -12.79580 | -38.8640 |
|       | [C <sub>4</sub> H <sub>7</sub> O <sub>2</sub> ]   | -54.46300 | 5.33918 | -15.26400 | -64.3878 |
|       | [C <sub>4</sub> H <sub>9</sub> SO <sub>4</sub> ]  | -26.65300 | 7.23264 | -17.27400 | -36.6944 |
|       | [Cl]                                              | -37.89254 | 4.31263 | -12.65482 | -46.2347 |
|       | [C <sub>2</sub> H <sub>6</sub> SO <sub>4</sub> ]  | -26.65200 | 6.66812 | -15.28700 | -35.2709 |
|       | [CHO <sub>2</sub> ]                               | -48.97700 | 4.40854 | -12.20900 | -56.7775 |
|       | [C <sub>6</sub> H <sub>11</sub> O <sub>2</sub> ]  | -56.10400 | 5.74951 | -17.19100 | -67.5455 |
|       | [HSO <sub>4</sub> ]                               | -30.33200 | 5.63759 | -12.96900 | -37.6634 |
|       | [I]                                               | -21.81800 | 5.41332 | -14.25300 | -30.6577 |
|       | [C <sub>3</sub> H <sub>5</sub> O <sub>3</sub> ]   | -44.15500 | 5.05979 | -14.31000 | -53.4052 |

|       |                                                   |           |         |           |          |
|-------|---------------------------------------------------|-----------|---------|-----------|----------|
|       | [NO <sub>3</sub> ]                                | -30.29300 | 5.19017 | -11.91200 | -37.0148 |
|       | [C <sub>8</sub> H <sub>15</sub> O <sub>2</sub> ]  | -55.85300 | 6.12483 | -19.09000 | -68.8182 |
|       | [C <sub>8</sub> H <sub>17</sub> SO <sub>4</sub> ] | -26.41800 | 8.20604 | -21.41200 | -39.6240 |
|       | [C <sub>3</sub> H <sub>5</sub> O <sub>2</sub> ]   | -55.81062 | 5.16040 | -14.24117 | -64.8914 |
|       | [C <sub>7</sub> H <sub>5</sub> O <sub>3</sub> ]   | -36.65700 | 6.80035 | -16.42600 | -46.2827 |
|       | [SCN]                                             | -25.72200 | 6.54765 | -13.88400 | -33.0584 |
|       | [BF <sub>4</sub> ]                                | -16.33559 | 8.04946 | -11.73973 | -20.0259 |
|       | [C <sub>2</sub> F <sub>3</sub> O <sub>2</sub> ]   | -33.99900 | 6.14297 | -12.83800 | -40.6940 |
| [Val] | [C <sub>2</sub> H <sub>3</sub> O <sub>2</sub> ]   | -40.13443 | 4.08852 | -11.08384 | -47.1298 |
|       | [C <sub>7</sub> H <sub>5</sub> O <sub>2</sub> ]   | -36.13700 | 4.88181 | -14.19000 | -45.4452 |
|       | [Br]                                              | -22.05235 | 4.78468 | -10.66426 | -27.9319 |
|       | [C <sub>4</sub> H <sub>7</sub> O <sub>2</sub> ]   | -40.05500 | 4.22246 | -13.09100 | -48.9235 |
|       | [C <sub>4</sub> H <sub>9</sub> SO <sub>4</sub> ]  | -19.05500 | 6.88903 | -15.09100 | -27.257  |
|       | [Cl]                                              | -27.40863 | 4.49827 | -10.40733 | -33.3177 |
|       | [C <sub>2</sub> H <sub>6</sub> SO <sub>4</sub> ]  | -19.04900 | 6.45334 | -13.07200 | -25.6677 |
|       | [CHO <sub>2</sub> ]                               | -35.90400 | 3.82431 | -9.99830  | -42.078  |
|       | [C <sub>6</sub> H <sub>11</sub> O <sub>2</sub> ]  | -40.85200 | 4.44680 | -15.04300 | -51.4482 |
|       | [HSO <sub>4</sub> ]                               | -23.40100 | 5.14097 | -10.72200 | -28.9820 |
|       | [I]                                               | -15.57500 | 5.44112 | -12.04200 | -22.1759 |
|       | [C <sub>3</sub> H <sub>5</sub> O <sub>3</sub> ]   | -32.26100 | 4.22451 | -12.12000 | -40.1565 |
|       | [NO <sub>3</sub> ]                                | -21.86700 | 4.78161 | -9.65370  | -26.7391 |
|       | [C <sub>8</sub> H <sub>15</sub> O <sub>2</sub> ]  | -41.15600 | 4.68350 | -16.95000 | -53.4225 |
|       | [C <sub>8</sub> H <sub>17</sub> SO <sub>4</sub> ] | -18.88500 | 7.71668 | -19.26900 | -30.4373 |
|       | [C <sub>3</sub> H <sub>5</sub> O <sub>2</sub> ]   | -41.06014 | 4.13854 | -12.05579 | -48.9774 |
|       | [C <sub>7</sub> H <sub>5</sub> O <sub>3</sub> ]   | -26.99700 | 5.47657 | -14.14100 | -35.6614 |
|       | [SCN]                                             | -18.58300 | 5.54977 | -11.52100 | -24.5542 |
|       | [BF <sub>4</sub> ]                                | -11.35901 | 7.05172 | -9.46724  | -13.7745 |
|       | [C <sub>2</sub> F <sub>3</sub> O <sub>2</sub> ]   | -25.05300 | 4.62902 | -10.63000 | -31.0540 |

---

| <b>Cations</b> | <b>Anions</b>                                     | <b>Hydrogen Bonding</b> | <b>Misfit Interactions</b> | <b>Van der Waals Forces</b> | <b>Excess Enthalpy (H<sup>E</sup>)</b> |
|----------------|---------------------------------------------------|-------------------------|----------------------------|-----------------------------|----------------------------------------|
| [EMIM]         | [C <sub>2</sub> H <sub>3</sub> O <sub>2</sub> ]   | -9.9070                 | 12.7391                    | -12.0300                    | -9.1979                                |
|                | [C <sub>7</sub> H <sub>5</sub> O <sub>2</sub> ]   | -8.4906                 | 10.9237                    | -15.1960                    | -12.7629                               |
|                | [Br]                                              | -5.7722                 | 12.3369                    | -12.1680                    | -5.6033                                |
|                | [C <sub>4</sub> H <sub>7</sub> O <sub>2</sub> ]   | -9.7674                 | 11.9781                    | -13.9750                    | -11.7643                               |
|                | [C <sub>4</sub> H <sub>9</sub> SO <sub>4</sub> ]  | -4.5239                 | 9.3428                     | -16.1000                    | -11.2811                               |
|                | [Cl]                                              | -7.2558                 | 14.0077                    | -11.5370                    | -4.7851                                |
|                | [C <sub>2</sub> H <sub>6</sub> SO <sub>4</sub> ]  | -4.6058                 | 9.2741                     | -14.1320                    | -9.4637                                |
|                | [CHO <sub>2</sub> ]                               | -8.8553                 | 12.1156                    | -10.9850                    | -7.7247                                |
|                | [C <sub>6</sub> H <sub>11</sub> O <sub>2</sub> ]  | -10.1070                | 12.4505                    | -15.8900                    | -13.5465                               |
|                | [HSO <sub>4</sub> ]                               | -10.1020                | 8.2082                     | -11.9480                    | -13.8418                               |
|                | [I]                                               | -4.1327                 | 10.1126                    | -13.5680                    | -7.5881                                |
|                | [C <sub>3</sub> H <sub>5</sub> O <sub>3</sub> ]   | -7.7036                 | 9.8502                     | -13.1070                    | -10.9604                               |
|                | [NO <sub>3</sub> ]                                | -5.1500                 | 8.7786                     | -10.7370                    | -7.1084                                |
|                | [C <sub>8</sub> H <sub>15</sub> O <sub>2</sub> ]  | -6.8351                 | 13.9156                    | -17.1580                    | -10.0775                               |
|                | [C <sub>8</sub> H <sub>17</sub> SO <sub>4</sub> ] | -4.3708                 | 9.9542                     | -20.1970                    | -14.6136                               |
|                | [C <sub>3</sub> H <sub>5</sub> O <sub>2</sub> ]   | -10.1270                | 12.5181                    | -12.9740                    | -10.5829                               |
|                | [C <sub>7</sub> H <sub>5</sub> O <sub>3</sub> ]   | -5.8865                 | 8.2842                     | -15.1970                    | -12.7993                               |
|                | [SCN]                                             | -4.0110                 | 7.4504                     | -13.0830                    | -9.6436                                |
|                | [BF <sub>4</sub> ]                                | -2.9910                 | 6.2971                     | -10.3410                    | -7.0349                                |
|                | [C <sub>2</sub> F <sub>3</sub> O <sub>2</sub> ]   | -5.5832                 | 7.5951                     | -11.3050                    | -9.2931                                |
| [BMIM]         | [C <sub>2</sub> H <sub>3</sub> O <sub>2</sub> ]   | -9.8292                 | 12.5244                    | -14.0360                    | -11.3408                               |
|                | [C <sub>7</sub> H <sub>5</sub> O <sub>2</sub> ]   | -8.4488                 | 11.1651                    | -17.1740                    | -14.4577                               |
|                | [Br]                                              | -5.6316                 | 11.7974                    | -14.1680                    | -8.0022                                |
|                | [C <sub>4</sub> H <sub>7</sub> O <sub>2</sub> ]   | -9.7162                 | 12.0062                    | -15.9980                    | -13.708                                |
|                | [C <sub>4</sub> H <sub>9</sub> SO <sub>4</sub> ]  | -4.4394                 | 9.7671                     | -18.1220                    | -12.7943                               |
|                | [Cl]                                              | -7.1156                 | 13.3089                    | -13.5340                    | -7.3407                                |
|                | [C <sub>2</sub> H <sub>6</sub> SO <sub>4</sub> ]  | -4.5064                 | 9.5991                     | -16.1400                    | -11.0473                               |
|                | [CHO <sub>2</sub> ]                               | -8.7552                 | 11.7758                    | -12.9820                    | -9.9614                                |
|                | [C <sub>6</sub> H <sub>11</sub> O <sub>2</sub> ]  | -10.0610                | 12.5216                    | -17.9220                    | -15.4614                               |
|                | [HSO <sub>4</sub> ]                               | -9.8998                 | 8.30448                    | -13.9550                    | -15.5503                               |
|                | [I]                                               | -2.9755                 | 11.0046                    | -15.0710                    | -7.0419                                |
|                | [C <sub>3</sub> H <sub>5</sub> O <sub>3</sub> ]   | -7.6334                 | 9.9979                     | -15.1230                    | -12.7585                               |
|                | [NO <sub>3</sub> ]                                | -5.0364                 | 8.8132                     | -12.7270                    | -8.9502                                |

|        |                                                   |          |         |          |          |
|--------|---------------------------------------------------|----------|---------|----------|----------|
|        | [C <sub>8</sub> H <sub>15</sub> O <sub>2</sub> ]  | -9.9894  | 12.3518 | -19.8130 | -17.4506 |
|        | [C <sub>8</sub> H <sub>17</sub> SO <sub>4</sub> ] | -4.3006  | 10.3870 | -22.2340 | -16.1476 |
|        | [C <sub>3</sub> H <sub>5</sub> O <sub>2</sub> ]   | -10.0660 | 12.4312 | -14.9860 | -12.6208 |
|        | [C <sub>7</sub> H <sub>5</sub> O <sub>3</sub> ]   | -5.9458  | 8.7440  | -17.1800 | -14.3818 |
|        | [SCN]                                             | -3.9393  | 7.7895  | -15.0290 | -11.1788 |
|        | [BF <sub>4</sub> ]                                | -2.8611  | 6.8790  | -12.3559 | -8.338   |
|        | [C <sub>2</sub> F <sub>3</sub> O <sub>2</sub> ]   | -5.4812  | 8.0975  | -13.2440 | -10.6277 |
| [HMIM] | [C <sub>2</sub> H <sub>3</sub> O <sub>2</sub> ]   | -9.7048  | 12.4848 | -16.0690 | -13.289  |
|        | [C <sub>7</sub> H <sub>5</sub> O <sub>2</sub> ]   | -5.6648  | 13.0529 | -18.5370 | -11.1489 |
|        | [Br]                                              | -5.4948  | 11.6236 | -16.2060 | -10.0772 |
|        | [C <sub>4</sub> H <sub>7</sub> O <sub>2</sub> ]   | -9.6059  | 12.0918 | -18.0380 | -15.5521 |
|        | [C <sub>4</sub> H <sub>9</sub> SO <sub>4</sub> ]  | -4.3465  | 10.0832 | -20.1620 | -14.4253 |
|        | [Cl]                                              | -6.9735  | 13.0155 | -15.5650 | -9.523   |
|        | [C <sub>2</sub> H <sub>6</sub> SO <sub>4</sub> ]  | -4.4041  | 9.8739  | -18.1720 | -12.7022 |
|        | [CHO <sub>2</sub> ]                               | -8.6252  | 11.6973 | -15.0110 | -11.9389 |
|        | [C <sub>6</sub> H <sub>11</sub> O <sub>2</sub> ]  | -9.9524  | 12.6258 | -19.9670 | -17.2936 |
|        | [HSO <sub>4</sub> ]                               | -9.7706  | 8.5580  | -15.9810 | -17.1936 |
|        | [I]                                               | -2.8490  | 11.2562 | -17.0240 | -8.6168  |
|        | [C <sub>3</sub> H <sub>5</sub> O <sub>3</sub> ]   | -7.5258  | 10.1718 | -17.1600 | -14.514  |
|        | [NO <sub>3</sub> ]                                | -4.9238  | 8.9938  | -14.7520 | -10.682  |
|        | [C <sub>8</sub> H <sub>15</sub> O <sub>2</sub> ]  | -9.8860  | 12.4917 | -21.8620 | -19.2563 |
|        | [C <sub>8</sub> H <sub>17</sub> SO <sub>4</sub> ] | -4.2194  | 10.7092 | -24.2830 | -17.7932 |
|        | [C <sub>3</sub> H <sub>5</sub> O <sub>2</sub> ]   | -6.8681  | 14.0647 | -16.3480 | -9.1514  |
|        | [C <sub>7</sub> H <sub>5</sub> O <sub>3</sub> ]   | -5.8734  | 9.1408  | -19.1930 | -15.9256 |
|        | [SCN]                                             | -3.8588  | 8.1605  | -17.0370 | -12.7353 |
|        | [BF <sub>4</sub> ]                                | -2.7522  | 7.3994  | -14.3940 | -9.7468  |
|        | [C <sub>2</sub> F <sub>3</sub> O <sub>2</sub> ]   | -5.4723  | 8.4645  | -15.3520 | -12.3598 |
| [OMIM] | [C <sub>2</sub> H <sub>3</sub> O <sub>2</sub> ]   | -9.6920  | 12.4953 | -18.0940 | -15.2907 |
|        | [C <sub>7</sub> H <sub>5</sub> O <sub>2</sub> ]   | -8.4289  | 11.5544 | -21.2080 | -18.0825 |
|        | [Br]                                              | -5.4373  | 11.6020 | -18.2320 | -12.0673 |
|        | [C <sub>4</sub> H <sub>7</sub> O <sub>2</sub> ]   | -9.6059  | 12.0918 | -18.0380 | -15.5521 |
|        | [C <sub>4</sub> H <sub>9</sub> SO <sub>4</sub> ]  | -4.3465  | 10.0832 | -20.1620 | -14.4253 |
|        | [Cl]                                              | -6.9857  | 12.8575 | -17.6010 | -11.7292 |
|        | [C <sub>2</sub> H <sub>6</sub> SO <sub>4</sub> ]  | -4.4041  | 9.8739  | -18.1720 | -12.7022 |
|        | [CHO <sub>2</sub> ]                               | -8.6252  | 11.6973 | -15.0110 | -11.9389 |
|        | [C <sub>6</sub> H <sub>11</sub> O <sub>2</sub> ]  | -10.0430 | 12.6728 | -22.0100 | -19.3802 |

|       |                                                   |         |         |          |          |
|-------|---------------------------------------------------|---------|---------|----------|----------|
|       | [HSO <sub>4</sub> ]                               | -9.7332 | 8.8541  | -18.0110 | -18.8901 |
|       | [I]                                               | -3.8505 | 10.0825 | -19.6120 | -13.38   |
|       | [C <sub>3</sub> H <sub>5</sub> O <sub>3</sub> ]   | -9.6883 | 12.1403 | -20.0770 | -17.625  |
|       | [NO <sub>3</sub> ]                                | -4.9179 | 9.2287  | -16.7820 | -12.4712 |
|       | [C <sub>8</sub> H <sub>15</sub> O <sub>2</sub> ]  | -9.9809 | 12.5600 | -23.9070 | -21.3279 |
|       | [C <sub>8</sub> H <sub>17</sub> SO <sub>4</sub> ] | -4.2234 | 10.9795 | -26.3270 | -19.5709 |
|       | [C <sub>3</sub> H <sub>5</sub> O <sub>2</sub> ]   | -9.9412 | 12.4938 | -19.0480 | -16.4954 |
|       | [C <sub>7</sub> H <sub>5</sub> O <sub>3</sub> ]   | -5.8631 | 9.4836  | -21.2020 | -17.5815 |
|       | [SCN]                                             | -3.8586 | 8.5381  | -19.0500 | -14.3705 |
|       | [BF <sub>4</sub> ]                                | -2.7067 | 7.9059  | -16.4340 | -11.2348 |
|       | [C <sub>2</sub> F <sub>3</sub> O <sub>2</sub> ]   | -5.5068 | 8.7820  | -17.3840 | -14.1088 |
| [EPy] | [C <sub>2</sub> H <sub>3</sub> O <sub>2</sub> ]   | -9.3672 | 12.5114 | -11.7830 | -8.6388  |
|       | [C <sub>7</sub> H <sub>5</sub> O <sub>2</sub> ]   | -5.3667 | 12.1915 | -14.4560 | -7.6312  |
|       | [Br]                                              | -5.6464 | 11.9755 | -12.0150 | -5.6859  |
|       | [C <sub>4</sub> H <sub>7</sub> O <sub>2</sub> ]   | -9.1795 | 11.7813 | -13.7110 | -11.1092 |
|       | [C <sub>4</sub> H <sub>9</sub> SO <sub>4</sub> ]  | -4.3845 | 9.0396  | -15.8280 | -11.1729 |
|       | [Cl]                                              | -3.5527 | 10.3949 | -8.3160  | -1.4738  |
|       | [C <sub>2</sub> H <sub>6</sub> SO <sub>4</sub> ]  | -4.4809 | 8.9385  | -13.8700 | -9.4124  |
|       | [CHO <sub>2</sub> ]                               | -8.4283 | 11.8616 | -10.7480 | -7.3147  |
|       | [C <sub>6</sub> H <sub>11</sub> O <sub>2</sub> ]  | -9.5156 | 12.2472 | -15.6180 | -12.8864 |
|       | [HSO <sub>4</sub> ]                               | -9.9115 | 7.8223  | -11.7140 | -13.8032 |
|       | [I]                                               | -3.0561 | 10.6526 | -13.0240 | -5.4275  |
|       | [C <sub>3</sub> H <sub>5</sub> O <sub>3</sub> ]   | -7.2763 | 9.6106  | -12.8400 | -10.5057 |
|       | [NO <sub>3</sub> ]                                | -4.9473 | 8.4541  | -10.4880 | -6.9812  |
|       | [C <sub>8</sub> H <sub>15</sub> O <sub>2</sub> ]  | -9.3985 | 12.0584 | -17.4950 | -14.8351 |
|       | [C <sub>8</sub> H <sub>17</sub> SO <sub>4</sub> ] | -4.2137 | 9.6815  | -19.9150 | -14.4472 |
|       | [C <sub>3</sub> H <sub>5</sub> O <sub>2</sub> ]   | -9.5511 | 12.3125 | -12.7190 | -9.9576  |
|       | [C <sub>7</sub> H <sub>5</sub> O <sub>3</sub> ]   | -5.4842 | 8.0922  | -14.9730 | -12.365  |
|       | [SCN]                                             | -3.7274 | 7.1983  | -12.9530 | -9.4821  |
|       | [BF <sub>4</sub> ]                                | -2.9679 | 5.9829  | -10.0560 | -7.041   |
|       | [C <sub>2</sub> F <sub>3</sub> O <sub>2</sub> ]   | -5.1795 | 7.4278  | -11.0250 | -8.7767  |
| [BPy] | [C <sub>2</sub> H <sub>3</sub> O <sub>2</sub> ]   | -9.1540 | 12.2964 | -13.7790 | -10.6366 |
|       | [C <sub>7</sub> H <sub>5</sub> O <sub>2</sub> ]   | -7.7234 | 11.0317 | -16.9420 | -13.6337 |
|       | [Br]                                              | -5.3947 | 11.4358 | -14.0140 | -7.9729  |
|       | [C <sub>4</sub> H <sub>7</sub> O <sub>2</sub> ]   | -9.0037 | 11.8140 | -15.7310 | -12.9207 |
|       | [C <sub>4</sub> H <sub>9</sub> SO <sub>4</sub> ]  | -4.2155 | 9.5187  | -17.8490 | -12.5458 |

|       |                                                   |         |         |          |          |
|-------|---------------------------------------------------|---------|---------|----------|----------|
|       | [Cl]                                              | -6.8334 | 12.9489 | -13.2760 | -7.1605  |
|       | [C <sub>2</sub> H <sub>6</sub> SO <sub>4</sub> ]  | -4.2924 | 9.3340  | -15.8730 | -10.8314 |
|       | [CHO <sub>2</sub> ]                               | -8.1967 | 11.5236 | -12.7300 | -9.4031  |
|       | [C <sub>6</sub> H <sub>11</sub> O <sub>2</sub> ]  | -9.3426 | 12.3170 | -17.6500 | -14.6756 |
|       | [HSO <sub>4</sub> ]                               | -9.6961 | 8.0491  | -13.6920 | -15.339  |
|       | [I]                                               | -3.8507 | 9.5723  | -15.3950 | -9.6734  |
|       | [C <sub>3</sub> H <sub>5</sub> O <sub>3</sub> ]   | -7.0925 | 9.7937  | -14.8510 | -12.1498 |
|       | [NO <sub>3</sub> ]                                | -4.7360 | 8.5527  | -12.4620 | -8.6453  |
|       | [C <sub>8</sub> H <sub>15</sub> O <sub>2</sub> ]  | -6.3360 | 13.9351 | -18.8710 | -11.2719 |
|       | [C <sub>8</sub> H <sub>17</sub> SO <sub>4</sub> ] | -4.0645 | 10.1631 | -21.9530 | -15.8544 |
|       | [C <sub>3</sub> H <sub>5</sub> O <sub>2</sub> ]   | -9.3583 | 12.2267 | -14.7250 | -11.8566 |
|       | [C <sub>7</sub> H <sub>5</sub> O <sub>3</sub> ]   | -5.3686 | 8.6548  | -16.9390 | -13.6528 |
|       | [SCN]                                             | -3.5852 | 7.6111  | -14.8860 | -10.8601 |
|       | [BF <sub>4</sub> ]                                | -2.7664 | 6.6615  | -12.0620 | -8.1669  |
|       | [C <sub>2</sub> F <sub>3</sub> O <sub>2</sub> ]   | -5.0681 | 7.9611  | -13.0370 | -10.144  |
| [HPy] | [C <sub>2</sub> H <sub>3</sub> O <sub>2</sub> ]   | -9.0707 | 12.2491 | -15.7910 | -12.6126 |
|       | [C <sub>7</sub> H <sub>5</sub> O <sub>2</sub> ]   | -5.1485 | 12.9675 | -18.2870 | -10.468  |
|       | [Br]                                              | -5.2730 | 11.2655 | -16.0300 | -10.0375 |
|       | [C <sub>4</sub> H <sub>7</sub> O <sub>2</sub> ]   | -8.9374 | 11.8910 | -12.2620 | -9.3084  |
|       | [C <sub>4</sub> H <sub>9</sub> SO <sub>4</sub> ]  | -4.1382 | 9.8502  | -16.7850 | -11.073  |
|       | [Cl]                                              | -6.7145 | 12.6470 | -15.2850 | -9.3525  |
|       | [C <sub>2</sub> H <sub>6</sub> SO <sub>4</sub> ]  | -4.2042 | 9.6284  | -12.8450 | -7.4208  |
|       | [CHO <sub>2</sub> ]                               | -8.1010 | 11.4419 | -6.2779  | -2.937   |
|       | [C <sub>6</sub> H <sub>11</sub> O <sub>2</sub> ]  | -9.2812 | 12.4095 | -19.6800 | -16.5517 |
|       | [HSO <sub>4</sub> ]                               | -9.5776 | 8.3265  | -15.6970 | -16.9481 |
|       | [I]                                               | -3.7392 | 9.6296  | -17.4020 | -11.5116 |
|       | [C <sub>3</sub> H <sub>5</sub> O <sub>3</sub> ]   | -7.0147 | 9.9737  | -10.7620 | -7.803   |
|       | [NO <sub>3</sub> ]                                | -4.6364 | 8.7552  | -6.3372  | -2.2184  |
|       | [C <sub>8</sub> H <sub>15</sub> O <sub>2</sub> ]  | -9.1828 | 12.3026 | -21.5720 | -18.4522 |
|       | [C <sub>8</sub> H <sub>17</sub> SO <sub>4</sub> ] | -4.0000 | 10.4955 | -24.9770 | -18.4815 |
|       | [C <sub>3</sub> H <sub>5</sub> O <sub>2</sub> ]   | -9.2653 | 12.2465 | -16.7210 | -13.7398 |
|       | [C <sub>7</sub> H <sub>5</sub> O <sub>3</sub> ]   | -5.3184 | 9.0644  | -14.7950 | -11.049  |
|       | [SCN]                                             | -3.5132 | 8.00334 | -9.2801  | -4.78996 |
|       | [BF <sub>4</sub> ]                                | -2.6628 | 7.21512 | -14.0830 | -9.53068 |
|       | [C <sub>2</sub> F <sub>3</sub> O <sub>2</sub> ]   | -5.0157 | 8.3608  | -15.0530 | -11.7079 |

|          |                                                   |                |                |                 |                 |
|----------|---------------------------------------------------|----------------|----------------|-----------------|-----------------|
| [OPy]    | [C <sub>2</sub> H <sub>3</sub> O <sub>2</sub> ]   | <b>-9.0176</b> | <b>12.2785</b> | <b>-17.8110</b> | <b>-14.5501</b> |
|          | [C <sub>7</sub> H <sub>5</sub> O <sub>2</sub> ]   | -7.6310        | 11.4692        | -20.9390        | -17.1008        |
|          | [Br]                                              | -5.1882        | 11.2637        | -18.0490        | -11.9735        |
|          | [C <sub>4</sub> H <sub>7</sub> O <sub>2</sub> ]   | -8.8949        | 11.9883        | -12.269         | -9.1756         |
|          | [C <sub>4</sub> H <sub>9</sub> SO <sub>4</sub> ]  | -4.0766        | 10.1633        | -16.7930        | -10.7063        |
|          | [Cl]                                              | -6.6342        | 12.5359        | -17.3050        | -11.4033        |
|          | [C <sub>2</sub> H <sub>6</sub> SO <sub>4</sub> ]  | -4.1354        | 9.9318         | -12.8460        | -7.0496         |
|          | [CHO <sub>2</sub> ]                               | -8.0392        | 11.4742        | -6.2747         | -2.8397         |
|          | [C <sub>6</sub> H <sub>11</sub> O <sub>2</sub> ]  | -9.2425        | 12.5064        | -21.7110        | -18.4471        |
|          | [HSO <sub>4</sub> ]                               | -9.4849        | 8.6564         | -17.7130        | -18.5415        |
|          | [I]                                               | -3.6571        | 9.8117         | -19.4140        | -13.2594        |
|          | [C <sub>3</sub> H <sub>5</sub> O <sub>3</sub> ]   | -6.9593        | 10.1716        | -10.7670        | -7.5547         |
|          | [NO <sub>3</sub> ]                                | -4.5632        | 9.0278         | -6.3305         | -1.8659         |
|          | [C <sub>8</sub> H <sub>15</sub> O <sub>2</sub> ]  | -9.1490        | 12.4205        | -23.6060        | -20.3345        |
|          | [C <sub>8</sub> H <sub>17</sub> SO <sub>4</sub> ] | -3.9483        | 10.7955        | -24.9920        | -18.1448        |
|          | [C <sub>3</sub> H <sub>5</sub> O <sub>2</sub> ]   | -9.2387        | 12.2985        | -18.7640        | -15.7042        |
|          | [C <sub>7</sub> H <sub>5</sub> O <sub>3</sub> ]   | -5.2821        | 9.4275         | -14.7830        | -10.6376        |
|          | [SCN]                                             | -3.4595        | 8.41156        | -9.2490         | -4.29694        |
|          | [BF <sub>4</sub> ]                                | -2.5812        | 7.7466         | -16.1120        | -10.9466        |
|          | [C <sub>2</sub> F <sub>3</sub> O <sub>2</sub> ]   | -4.9766        | 8.71466        | -17.074         | -13.3359        |
| [EMPyrr] | [C <sub>2</sub> H <sub>3</sub> O <sub>2</sub> ]   | -4.4588        | 15.3480        | -12.1060        | -1.2168         |
|          | [C <sub>7</sub> H <sub>5</sub> O <sub>2</sub> ]   | -3.5879        | 13.0985        | -15.1510        | -5.6404         |
|          | [Br]                                              | -2.8233        | 14.7372        | -12.0390        | -0.1251         |
|          | [C <sub>4</sub> H <sub>7</sub> O <sub>2</sub> ]   | -4.3141        | 14.3865        | -12.2470        | -2.1746         |
|          | [C <sub>4</sub> H <sub>9</sub> SO <sub>4</sub> ]  | -2.1408        | 10.7378        | -16.7470        | -8.15           |
|          | [Cl]                                              | -3.5295        | 16.7004        | -11.6390        | 1.5319          |
|          | [C <sub>2</sub> H <sub>6</sub> SO <sub>4</sub> ]  | -2.2089        | 10.7908        | -12.7910        | -4.2091         |
|          | [CHO <sub>2</sub> ]                               | -4.0323        | 14.6582        | -6.2228         | 4.4031          |
|          | [C <sub>6</sub> H <sub>11</sub> O <sub>2</sub> ]  | -4.4656        | 14.8623        | -16.0340        | -5.6373         |
|          | [HSO <sub>4</sub> ]                               | -7.8192        | 9.78924        | -11.9870        | -10.017         |
|          | [I]                                               | -2.0660        | 12.0864        | -13.4360        | -3.4156         |
|          | [C <sub>3</sub> H <sub>5</sub> O <sub>3</sub> ]   | -3.4467        | 11.8853        | -10.7440        | -2.3054         |
|          | [NO <sub>3</sub> ]                                | -2.4125        | 10.6223        | -6.2936         | 1.9162          |
|          | [C <sub>8</sub> H <sub>15</sub> O <sub>2</sub> ]  | -4.3751        | 14.5703        | -17.9380        | -7.7428         |
|          | [C <sub>8</sub> H <sub>17</sub> SO <sub>4</sub> ] | -2.0238        | 11.2445        | -24.9590        | -15.7383        |
|          | [C <sub>3</sub> H <sub>5</sub> O <sub>2</sub> ]   | -4.3931        | 15.1318        | -13.0680        | -2.3293         |

|          |                                                   |         |         |          |          |
|----------|---------------------------------------------------|---------|---------|----------|----------|
|          | [C <sub>7</sub> H <sub>5</sub> O <sub>3</sub> ]   | -2.4663 | 9.7770  | -14.6510 | -7.3403  |
|          | [SCN]                                             | -1.7645 | 9.0117  | -8.9235  | -1.6763  |
|          | [BF <sub>4</sub> ]                                | -1.5454 | 7.4309  | -10.5030 | -4.6175  |
|          | [C <sub>2</sub> F <sub>3</sub> O <sub>2</sub> ]   | -2.3846 | 9.1261  | -11.4120 | -4.6705  |
| [BMPyrr] | [C <sub>2</sub> H <sub>3</sub> O <sub>2</sub> ]   | -4.4133 | 14.9694 | -14.1440 | -3.5879  |
|          | [C <sub>7</sub> H <sub>5</sub> O <sub>2</sub> ]   | -3.5678 | 13.2508 | -17.1680 | -7.485   |
|          | [Br]                                              | -2.7252 | 13.9801 | -14.0730 | -2.8181  |
|          | [C <sub>4</sub> H <sub>7</sub> O <sub>2</sub> ]   | -4.2925 | 14.3232 | -12.2470 | -2.2163  |
|          | [C <sub>4</sub> H <sub>9</sub> SO <sub>4</sub> ]  | -2.0697 | 11.1077 | -16.7430 | -7.705   |
|          | [Cl]                                              | -3.4310 | 15.7857 | -13.6830 | -1.3283  |
|          | [C <sub>2</sub> H <sub>6</sub> SO <sub>4</sub> ]  | -2.1261 | 11.0060 | -12.7830 | -3.9031  |
|          | [CHO <sub>2</sub> ]                               | -3.9638 | 14.1104 | -6.2194  | 3.9272   |
|          | [C <sub>6</sub> H <sub>11</sub> O <sub>2</sub> ]  | -4.4529 | 14.8801 | -18.0740 | -7.6468  |
|          | [HSO <sub>4</sub> ]                               | -7.7171 | 9.7171  | -14.0200 | -12.02   |
|          | [I]                                               | -1.9694 | 11.6344 | -15.4620 | -5.797   |
|          | [C <sub>3</sub> H <sub>5</sub> O <sub>3</sub> ]   | -3.3932 | 11.9203 | -10.7410 | -2.2139  |
|          | [NO <sub>3</sub> ]                                | -2.3207 | 10.4200 | -6.2888  | 1.8105   |
|          | [C <sub>8</sub> H <sub>15</sub> O <sub>2</sub> ]  | -4.3705 | 14.6645 | -19.9800 | -9.686   |
|          | [C <sub>8</sub> H <sub>17</sub> SO <sub>4</sub> ] | -1.9654 | 11.6773 | -24.9580 | -15.2461 |
|          | [C <sub>3</sub> H <sub>5</sub> O <sub>2</sub> ]   | -4.4887 | 14.8492 | -15.1060 | -4.7455  |
|          | [C <sub>7</sub> H <sub>5</sub> O <sub>3</sub> ]   | -2.4369 | 10.2303 | -14.6350 | -6.8416  |
|          | [SCN]                                             | -1.7027 | 9.1303  | -8.8875  | -1.4599  |
|          | [BF <sub>4</sub> ]                                | -1.4418 | 7.7527  | -12.5490 | -6.2381  |
|          | [C <sub>2</sub> F <sub>3</sub> O <sub>2</sub> ]   | -2.2747 | 9.5374  | -13.4510 | -6.1883  |
| [HMPyrr] | [C <sub>2</sub> H <sub>3</sub> O <sub>2</sub> ]   | -4.2967 | 14.8767 | -16.1960 | -5.616   |
|          | [C <sub>7</sub> H <sub>5</sub> O <sub>2</sub> ]   | -3.4758 | 13.4511 | -19.2100 | -9.2347  |
|          | [Br]                                              | -2.6179 | 13.7042 | -16.1360 | -5.0497  |
|          | [C <sub>4</sub> H <sub>7</sub> O <sub>2</sub> ]   | -4.2925 | 14.3232 | -12.2470 | -2.2163  |
|          | [C <sub>4</sub> H <sub>9</sub> SO <sub>4</sub> ]  | -2.0697 | 11.1077 | -16.7430 | -7.705   |
|          | [Cl]                                              | -3.3147 | 15.3903 | -15.7380 | -3.6624  |
|          | [C <sub>2</sub> H <sub>6</sub> SO <sub>4</sub> ]  | -2.1261 | 11.0060 | -12.7830 | -3.9031  |
|          | [CHO <sub>2</sub> ]                               | -3.9638 | 14.1104 | -6.2194  | 3.9272   |
|          | [C <sub>6</sub> H <sub>11</sub> O <sub>2</sub> ]  | -4.3518 | 14.9875 | -20.1270 | -9.4913  |
|          | [HSO <sub>4</sub> ]                               | -7.6140 | 9.8714  | -16.0700 | -13.8126 |
|          | [I]                                               | -1.3596 | 12.6741 | -16.9680 | -5.6535  |
|          | [C <sub>3</sub> H <sub>5</sub> O <sub>3</sub> ]   | -3.2932 | 12.0637 | -10.7440 | -1.9735  |



|          |                                                   |          |         |          |          |
|----------|---------------------------------------------------|----------|---------|----------|----------|
|          | [NO <sub>3</sub> ]                                | -2.2256  | 10.4983 | -6.2867  | 1.986    |
|          | [C <sub>8</sub> H <sub>15</sub> O <sub>2</sub> ]  | -4.2740  | 14.8211 | -22.0340 | -11.4869 |
|          | [C <sub>8</sub> H <sub>17</sub> SO <sub>4</sub> ] | -1.9000  | 12.0136 | -24.9680 | -14.8544 |
|          | [C <sub>3</sub> H <sub>5</sub> O <sub>2</sub> ]   | -4.3780  | 14.8391 | -17.1570 | -6.6959  |
|          | [C <sub>7</sub> H <sub>5</sub> O <sub>3</sub> ]   | -2.3636  | 10.6183 | -14.6330 | -6.3783  |
|          | [SCN]                                             | -1.6303  | 9.4125  | -8.8816  | -1.0994  |
|          | [BF <sub>4</sub> ]                                | -1.3611  | 8.164-  | -14.6020 | -15.9631 |
|          | [C <sub>2</sub> F <sub>3</sub> O <sub>2</sub> ]   | -2.2786  | 9.8722  | -15.5030 | -7.9094  |
| [OMPyrr] | [C <sub>2</sub> H <sub>3</sub> O <sub>2</sub> ]   | -4.2830  | 14.8623 | -18.2430 | -7.6637  |
|          | [C <sub>7</sub> H <sub>5</sub> O <sub>2</sub> ]   | -3.4717  | 13.6429 | -21.2490 | -11.0778 |
|          | [Br]                                              | -2.5744  | 13.6270 | -18.1910 | -7.1384  |
|          | [C <sub>4</sub> H <sub>7</sub> O <sub>2</sub> ]   | -4.1828  | 14.4708 | -12.2530 | -1.965   |
|          | [C <sub>4</sub> H <sub>9</sub> SO <sub>4</sub> ]  | -1.9632  | 11.7024 | -16.7540 | -7.0148  |
|          | [Cl]                                              | -3.2768  | 15.2005 | -17.7880 | -5.8643  |
|          | [C <sub>2</sub> H <sub>6</sub> SO <sub>4</sub> ]  | -2.0071  | 11.4986 | -12.7870 | -3.2955  |
|          | [CHO <sub>2</sub> ]                               | -3.8220  | 13.9221 | -6.2183  | 3.8818   |
|          | [C <sub>6</sub> H <sub>11</sub> O <sub>2</sub> ]  | -4.3508  | 15.0760 | -22.1750 | -11.4498 |
|          | [HSO <sub>4</sub> ]                               | -5.3363  | 11.5196 | -17.5070 | -11.3237 |
|          | [I]                                               | -1.8347  | 11.6637 | -19.5700 | -9.741   |
|          | [C <sub>3</sub> H <sub>5</sub> O <sub>3</sub> ]   | -3.27100 | 12.2319 | -10.7460 | -1.7851  |
|          | [NO <sub>3</sub> ]                                | -2.1858  | 10.6961 | -6.2851  | 2.2252   |
|          | [C <sub>8</sub> H <sub>15</sub> O <sub>2</sub> ]  | -4.2768  | 14.9395 | -24.0820 | -13.4193 |
|          | [C <sub>8</sub> H <sub>17</sub> SO <sub>4</sub> ] | -1.8753  | 12.3090 | -24.9790 | -14.5453 |
|          | [C <sub>3</sub> H <sub>5</sub> O <sub>2</sub> ]   | -4.2332  | 14.9327 | -19.2030 | -8.5035  |
|          | [C <sub>7</sub> H <sub>5</sub> O <sub>3</sub> ]   | -2.3512  | 10.9652 | -14.6330 | -6.019   |
|          | [SCN]                                             | -1.6014  | 9.7612  | -8.8770  | -0.7172  |
|          | [BF <sub>4</sub> ]                                | -1.3134  | 8.6205  | -16.6500 | -9.3429  |
|          | [C <sub>2</sub> F <sub>3</sub> O <sub>2</sub> ]   | -2.2620  | 10.2101 | -17.5460 | -9.5979  |

---

**Figure S1**

*Sigma profile of individual amino acid cations (a, b, c) and imidazolium, pyridinium, and pyrrolidinium cations (d, e).*

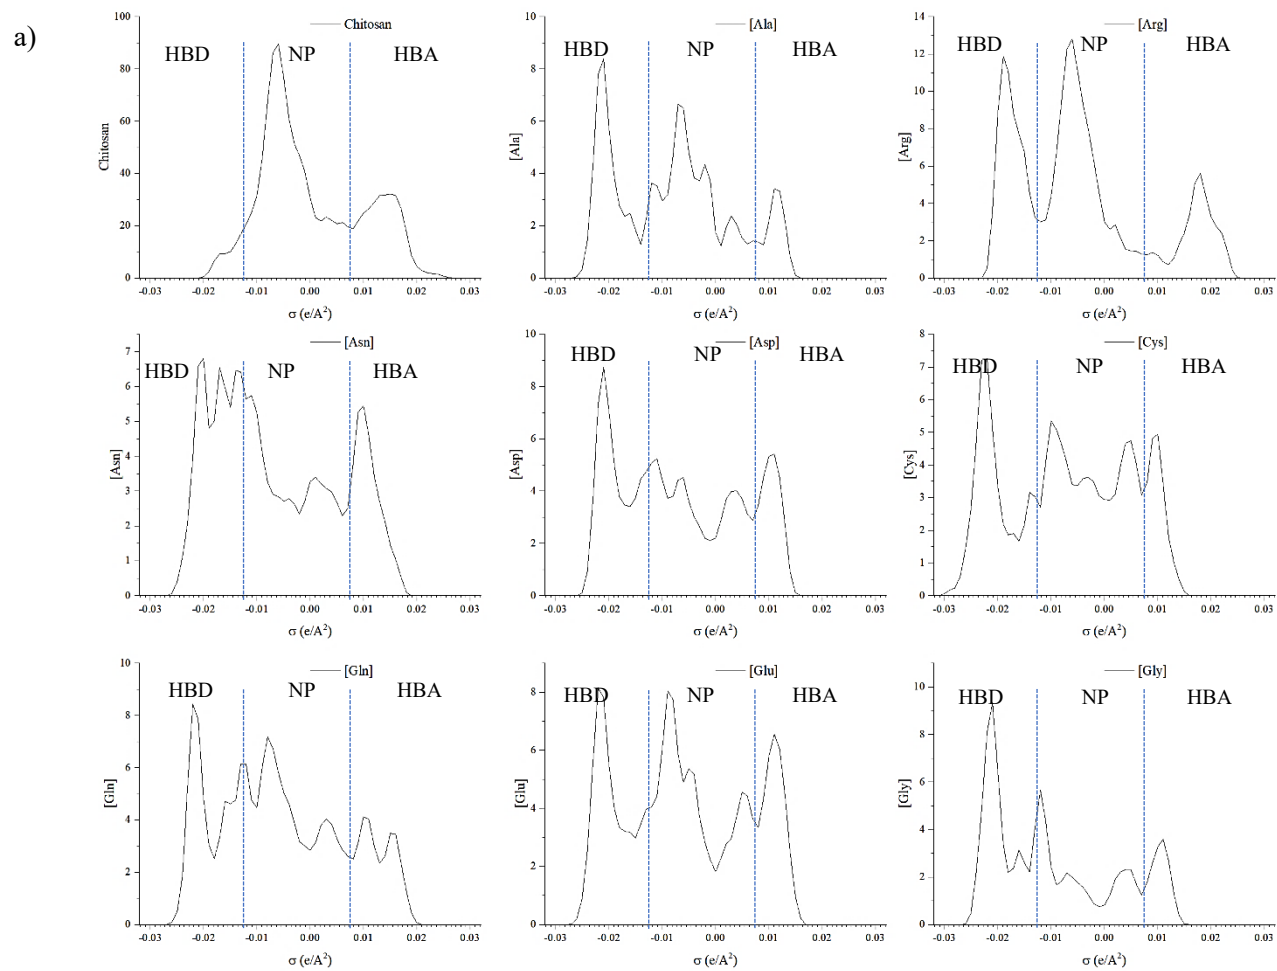

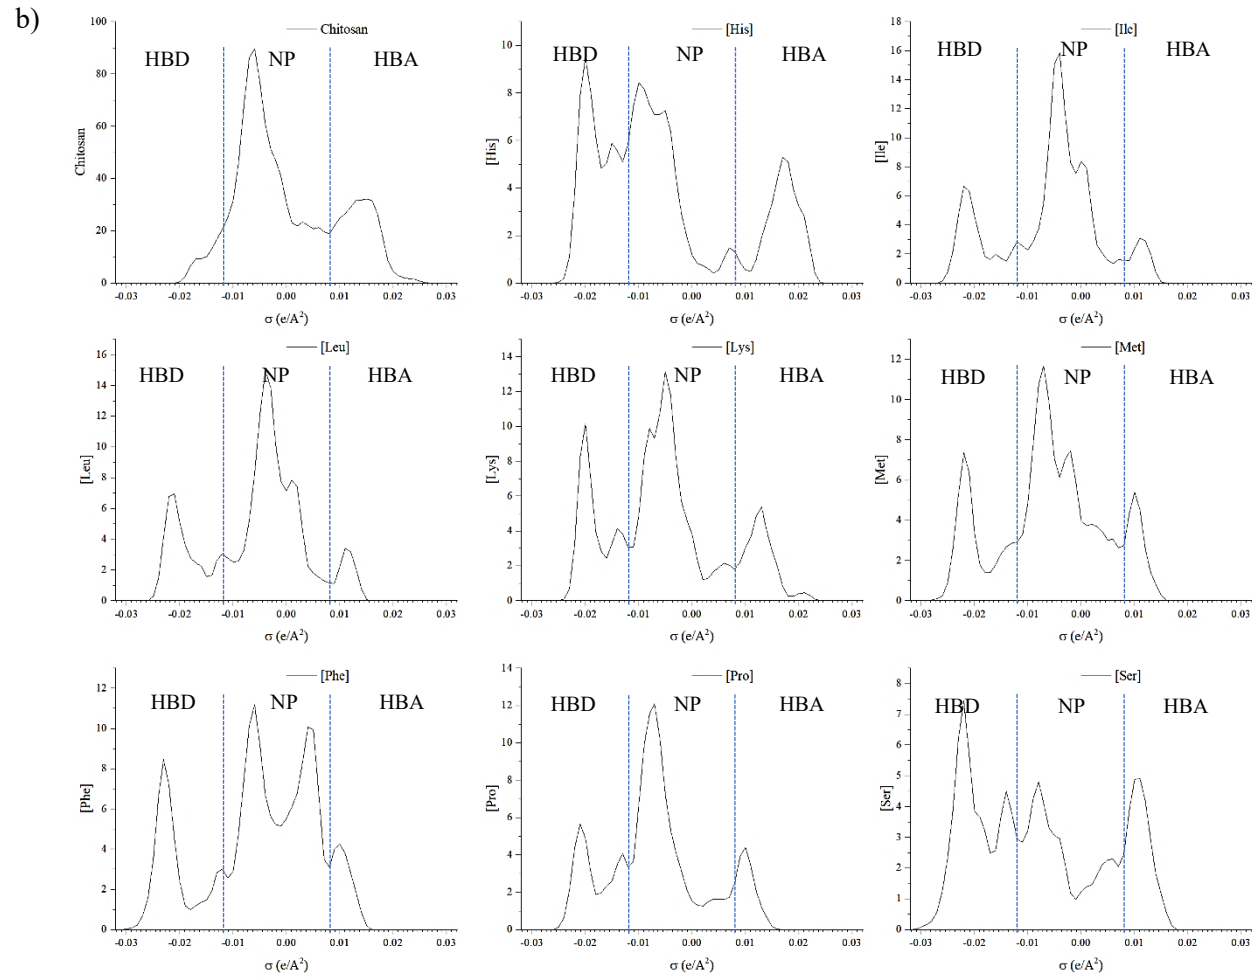

c)

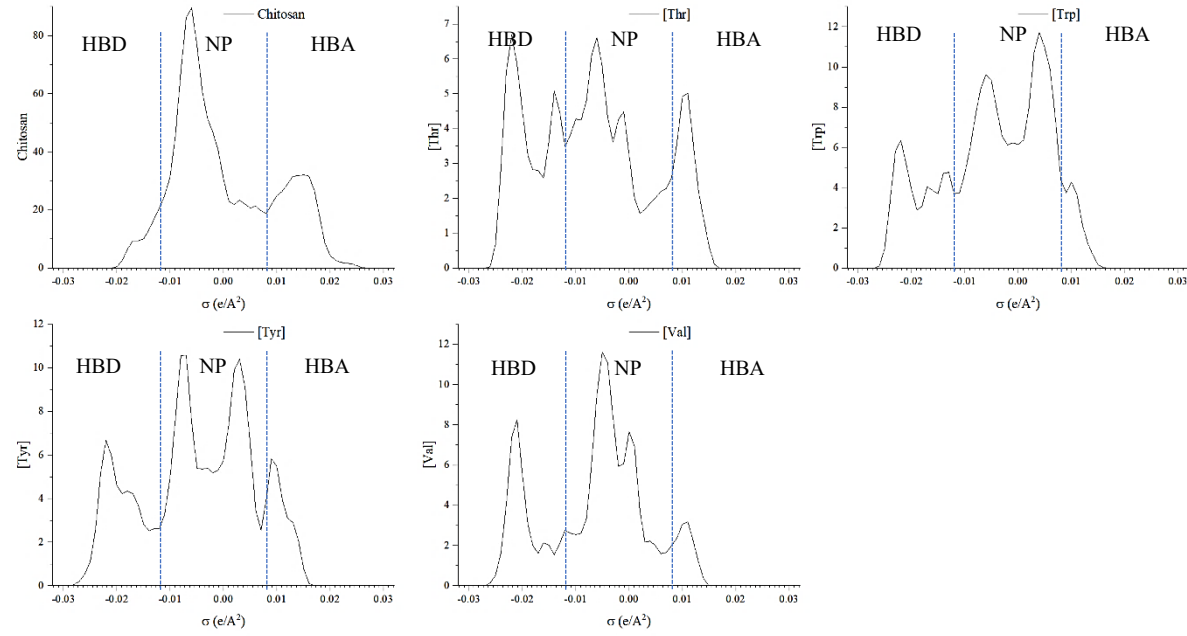

d)

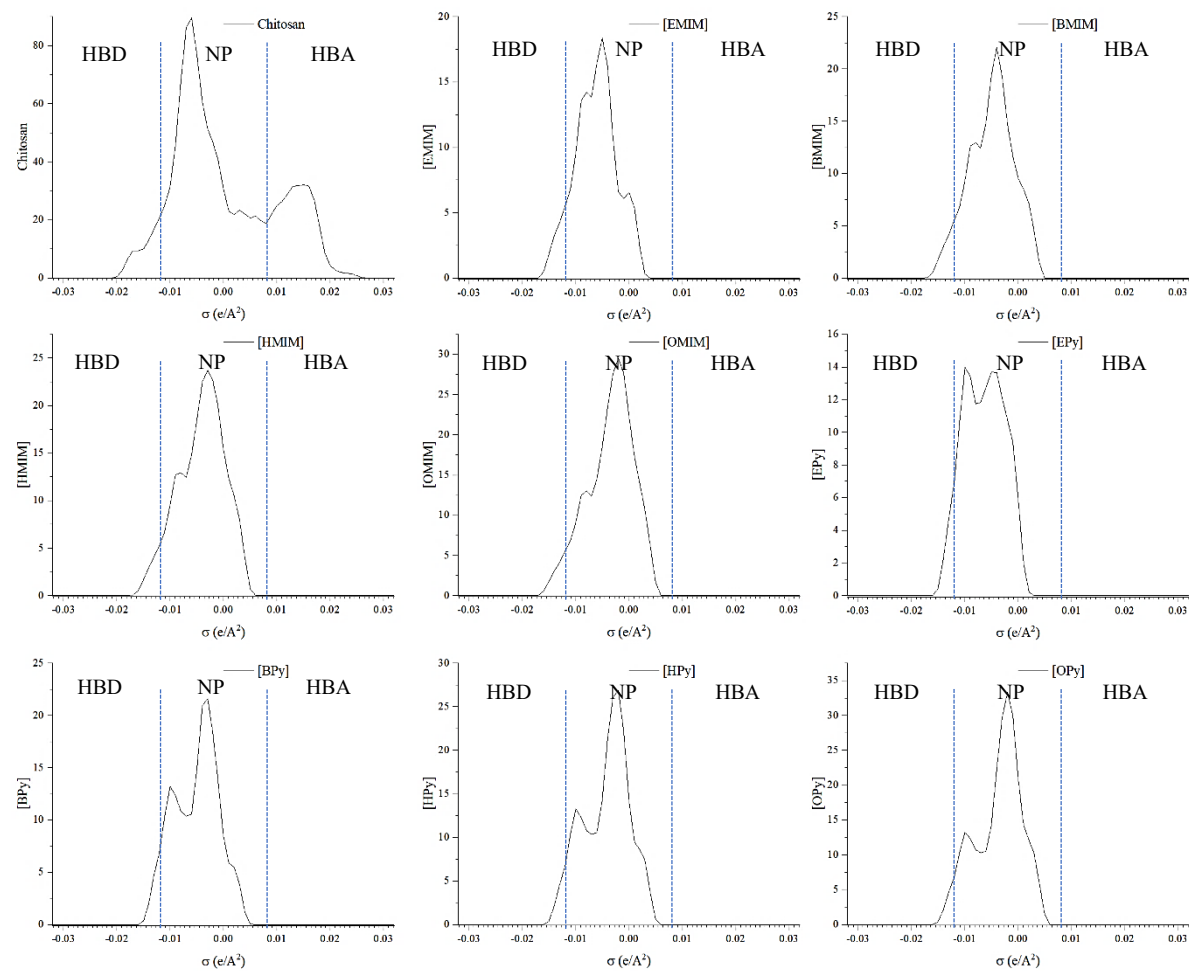

e)

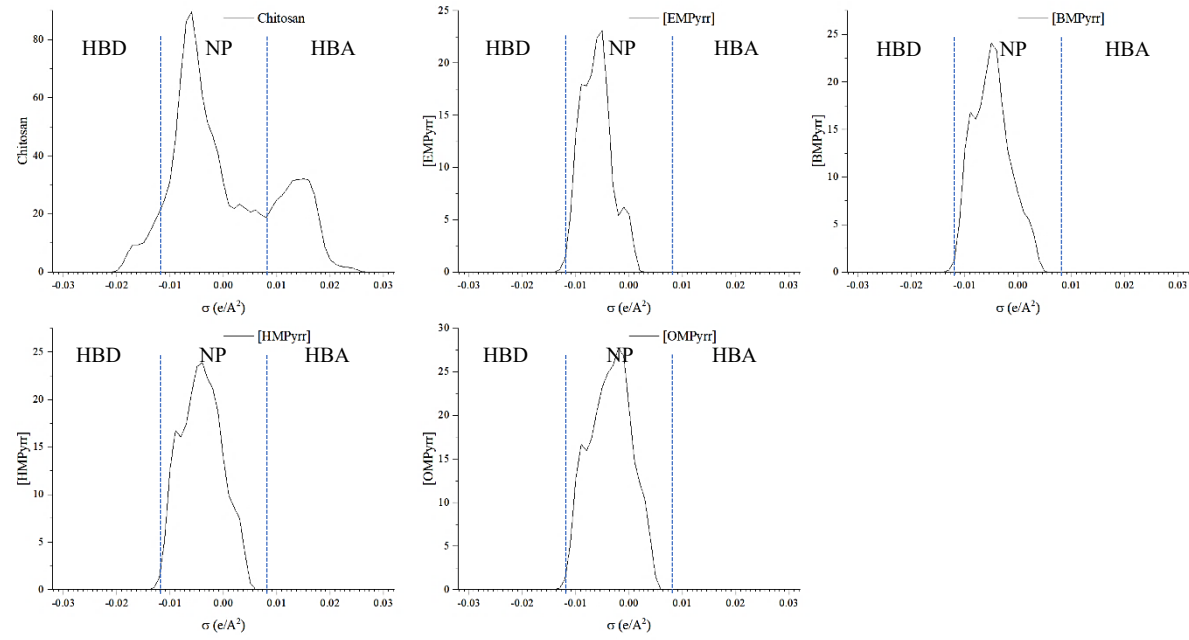

Figure S2

*Sigma profile of individual anions (a, b, c)*

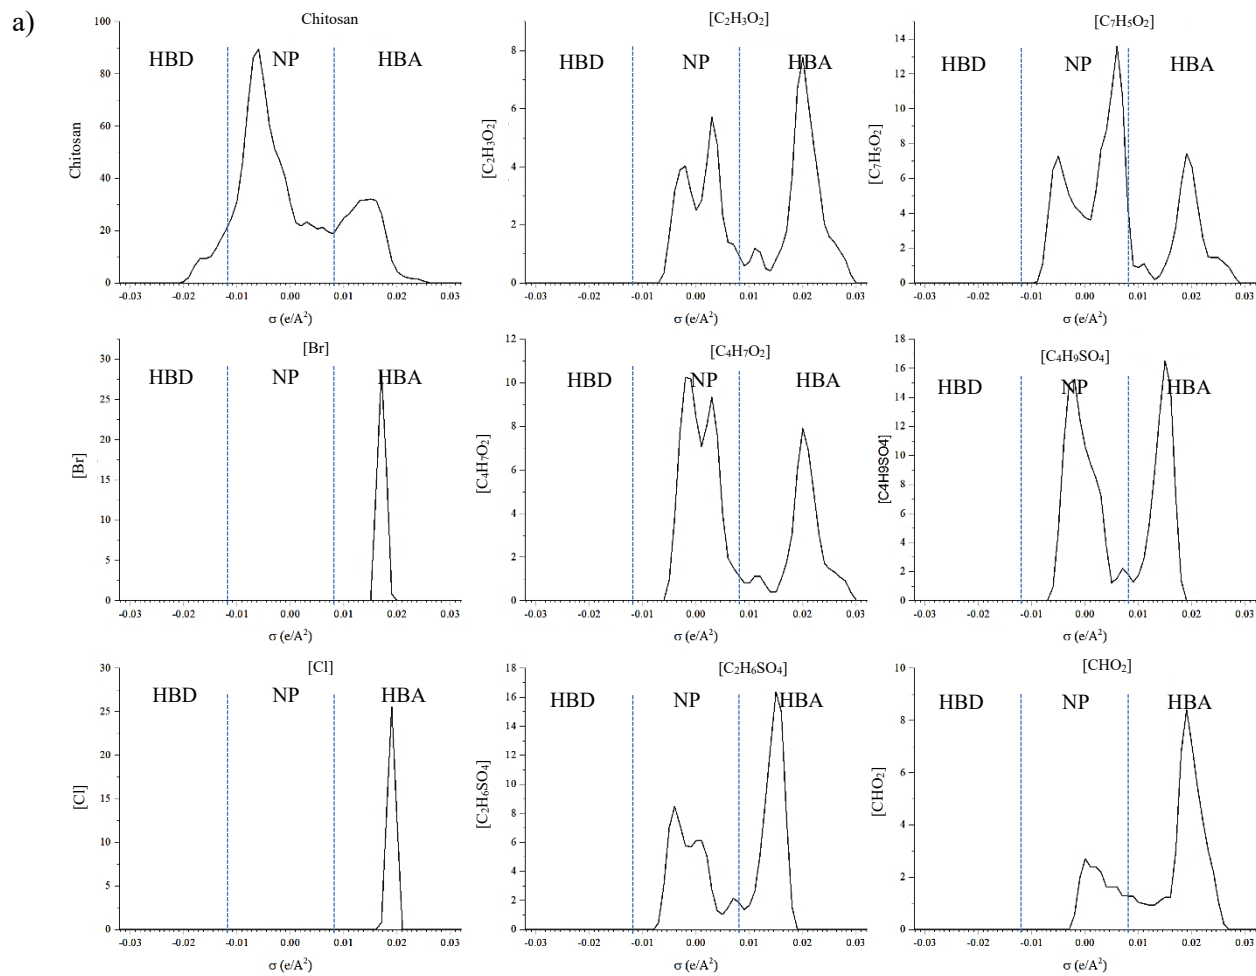

b)

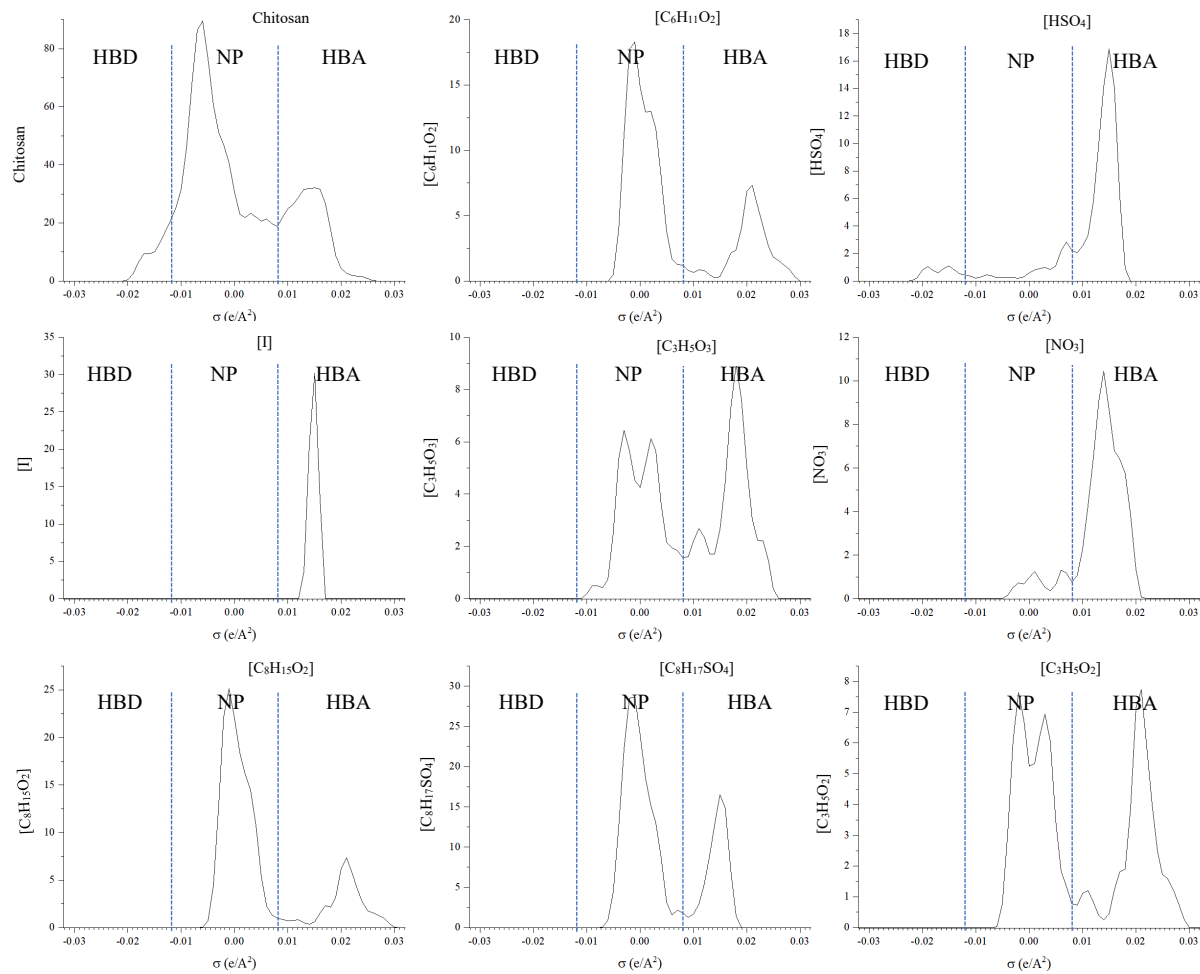



c)

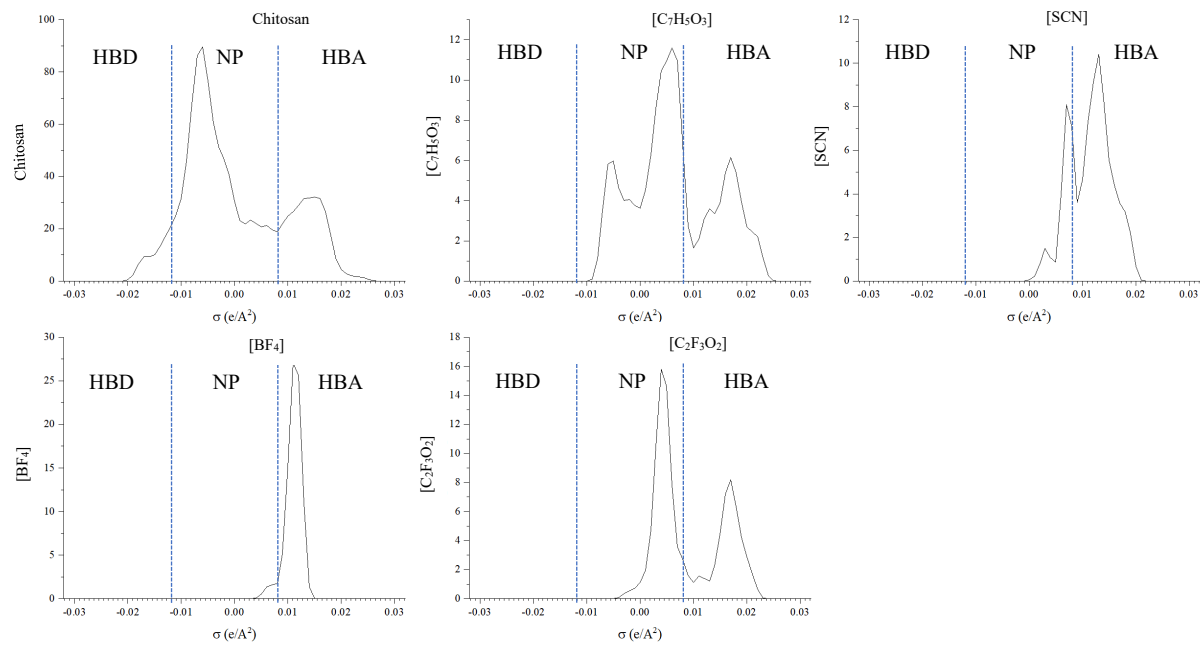

**Figure S3**

*Suggested formation of hydrogen bonds between [Ser]<sup>+</sup> and chitosan.*

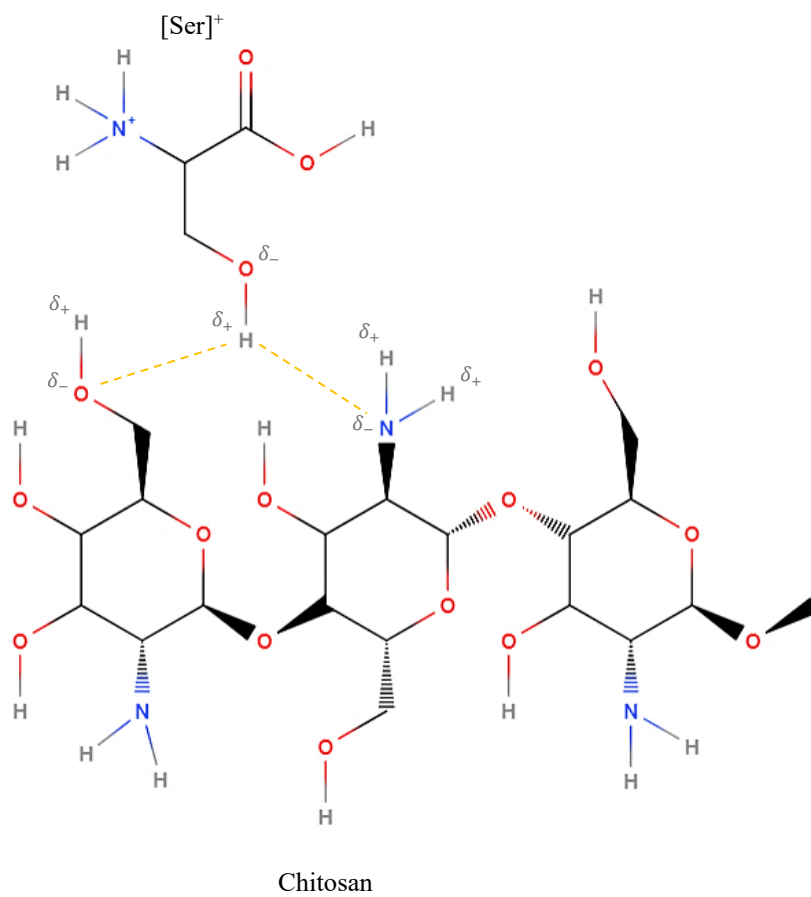

**Figure S4**

*Suggested formation of hydrogen bonds between  $[BF_4]^-$  and chitosan.*

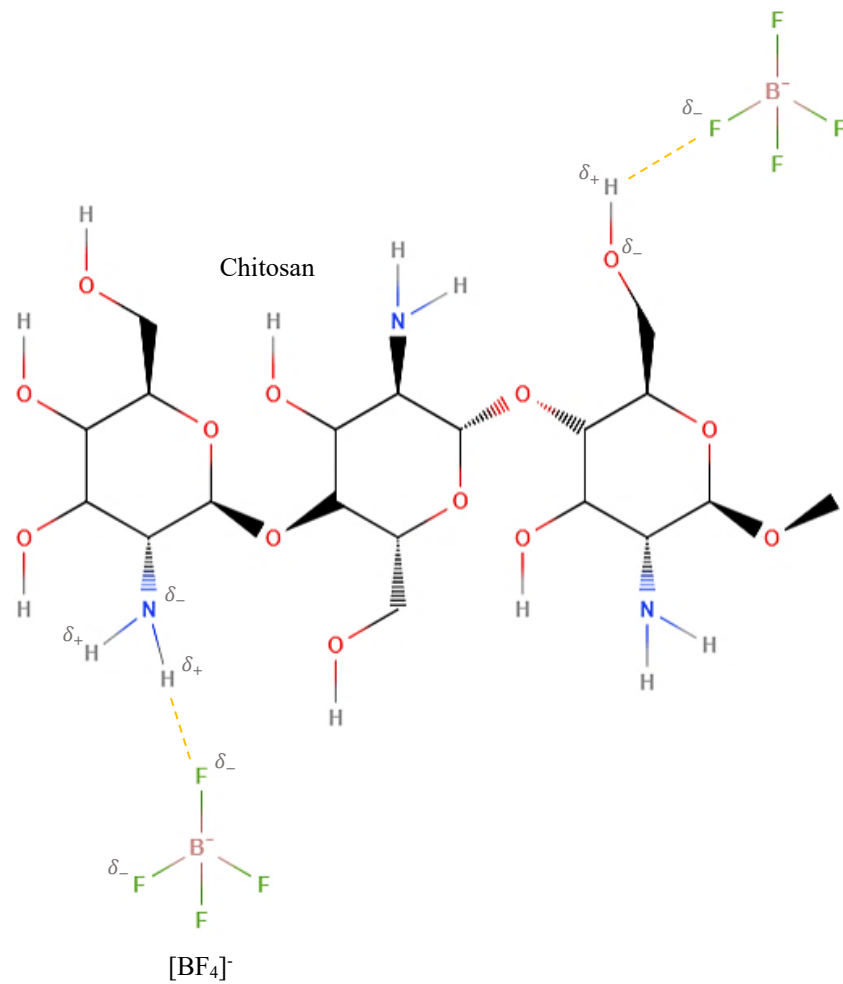

Supplement: d3gc03586g1.pdf [file d3gc03586g1.pdf]
